# Supplementary material for: Regional regression models of percentile flows for the contiguous US: Expert versus data-driven independent variable selection
Source: Copernicus journal article supplement (doi:10.5194/hess-2016-639), 2016-12-19
Supplement: Supplementary file [file hess-2016-639-AC2-supplement.pdf]

1 **Revised Final Response:** Performance of drainage-area ratio method suggested by Referee 2 updated after identifying error  
2 in the calculation involving units. Performance slightly better after correction, but no changes in performance between  
3 prediction methods. Overall results remain the same.

#### 4 **Response to Referee 1**

5 Thank you for your comments. Responses to your comments are provided below.

6 1) In Introduction, the authors should focus the main part of study and let the researcher know why they should prefer  
7 your research and why we need this research e.g., comparative improvement of this study from the preceding is.

8 **Response:** Introduction has been revised to describe the focus of the study and why it is needed. Data-driven methods  
9 are widely used for regional regression modeling. However, regional regression models were historically developed  
10 using an expert assessment of available independent variables. The two approaches have yet to be compared, and this  
11 study does so in order to create regional regression models for the contiguous US.

12 2) The author adopted a model in which FDC percentiles are regionalized independently, this may not guarantee an  
13 important property of FDC i.e., congruence of the percentiles which must be non-increasing Lacking significant  
14 description of adequacy test for developed regression models.

15 **Response:** This limitation is recognized in the methods section on “Regression model development”. An ordinal  
16 relation between predicted percentile flows is not guaranteed by the regression modeling approach, and errors of this  
17 type are not explicitly examined, although they do contribute to the overall error assessed in the performance evaluation.  
18 Further consideration of this matter is given in the discussion section on “Improving performance of percentile flow  
19 predictions”. Preserving an ordinal relation between predicted percentile flows is proposed as a means to improve  
20 predictions.

21 3) There is a quite possibility that large numbers of variable (descriptors) may ensued in decreasing the efficacy of the  
22 regression model because of numbers of issue e.g., multicollinearity. Moreover, it is also expected that after  
23 prudently managing the aforementioned issue, the efficacy of the developed regression models could be enhanced.  
24 So, for more attractive and significant results, aforementioned concerns should be carefully addressed.

1 **Response:** The issue of multicollinearity is now addressed in more depth. A portion of the results section on  
2 “Independent variables selected for the regression models using random forests” describes the multicollinearity of the  
3 regression models. The reason this issue was not managed is because multicollinearity is less of a concern for regression  
4 model performance when using a representative sample of the data for validation (Baguley, 2012), which was the case  
5 here. The discussion section on “Improving performance of percentile flow predictions” addresses the problem of  
6 multicollinearity for regression modeling. Methods for managing the multicollinearity of regression models may not  
7 improve performance (Kroll and Song, 2013), and the issue of multicollinearity may call for the use of machine learning  
8 methods that are more tolerant to multicollinearity (Dormann et al., 2013).

1 **Response to Referee 2**

2 Thank you for your comments. All of your comments have been addressed in the text and direct responses follow.

3 1) Unfortunately, the approach taken in the manuscript, does not appear to include any fundamentally new approaches  
4 to the problem, because it simply combines commonly used approaches such as clustering and random forests with  
5 multivariate regression combined with very a large national dataset. I do not see any way to convert the approach  
6 taken in this paper into the type of scientific contribution required for publication in HESS

7 **Response:** The intent of the study was not to develop a new modeling method. Rather, the study compares different  
8 approaches to select the independent variables of a regional regression, which is often overlooked for the purpose of  
9 evaluating different types of models. Independent variables are essential for regional regression modeling, yet it remains  
10 unclear how to select independent variables (i.e. data –driven or expert assessment). The paper addresses this problem,  
11 and in doing so, contributes to the science of identifying a generalized solution to predict the FDC in ungauged basins.  
12 The scientific contribution of the study has been outlined in the Introduction.

13 2) What guidance do Castellarin et al. (2013) give for addressing this problem? Having reviewed ALL the literature on  
14 this problem, they should give some good guidance..

15 **Response:** Castellarin et al. (2013) highlights the importance of physical understanding in selecting independent  
16 variables. This paper builds on that notion by evaluating a data-driven approach versus independent variables selected  
17 based on physical understanding from the literature as Castellarin et al. (2013) emphasizes. You can now find the  
18 guidance of Castellarin et al. (2013) to select physically meaningful variables in the Introduction and discussion of  
19 “Independent variables for regional regression modeling” in the Introduction.

20 3) An existing national model for estimation of an FDC for ungauged sites in the continental United States exists,  
21 within the USGS STREAMSTATS program. This system is now operational for most regions of the US. How does  
22 your approach differ from the approach taken in STREAMSTATS? I believe STREAMSTATS takes a very similar  
23 approach to you, thus it is absolutely essential that you answer this question. I was very surprised that you never  
24 even mentioned the USGS STREAMSTATS system!

1 **Response:** The approach of the present study covers the contiguous US and groups basins according to characteristics  
2 related to flow, whereas StreamStats does not cover the contiguous US and has developed models for states. These  
3 differences are now provided in the Introduction of the text.

4 4) How does your approach compare with the results of STREAMSTATS for your validation stations, or at least a  
5 subset of your validation stations. There are also some recent USGS reports who have done some intercomparison  
6 studies which are not cited in your study.

7 **Response:** It was not possible to compare StreamStats to the validation of the present study since StreamStats uses the  
8 type of long-term basins with greater than thirty years of data that were used for validation in this study. The reason why  
9 this study was not compared to StreamStats is now explained at the end of the results section on “Regression model  
10 performance.” Comparing StreamStats to the tool developed for this study is suggested for future work at the end of the  
11 Results section.

12 5) All of your statistical analyses are based on very classical regression methods and goodness of fit procedures. This  
13 is both good and bad. It is good because your results will be understood by a wider audience. It is bad because you  
14 do not consider the new generation of ‘influence statistics’ which enable one to use ordinary regression procedures  
15 while simultaneously understanding the influence of outliers and more importantly the observations which have a  
16 large influence on the model coefficients. Please read the chapters in Helsel and Hirsch (2002) which explain how  
17 to use ‘influence statistics’ such as DFITS and Cooks D, and ‘Prediction Rsquared’ in addition to some of the  
18 statistics you used. I would never trust a national model that was not subject to this sort of analysis, because it is  
19 very likely that just a few anomalous stations are driving the entire model in each region.

20 **Response:** The limitation of not reducing the influence of outliers is stated at the end of the methods section on  
21 “Regression model development.” A reason why this study along with others have not used the type of “influence  
22 statistics” you recommend is because it can be difficult to determine if an outlier is an erroneous value, and if it is, it can  
23 be difficult to determine how to adjust the value. For these reasons, the use of machine learning methods that may have  
24 the ability to account for outliers without over-influencing the entire model is suggested in the discussion section on  
25 “Improving performance of percentile flow predictions.”

1 6) At the very least, you should do the following intercomparison. To be able to determine if your model is an  
2 improvement over others, i suggest you do a very simple comparison. For each of your validation sites, simply use  
3 the drainage area discharge relationship to transfer the flows from the nearest gaged site to the validation site. Then  
4 construct the FDC for that site and compare it to your model. I wonder if your model is better than this very simple  
5 model! It is this type of comparison which makes your work credible and useful.

6 **Response:** Performance of the drainage-area ratio method added to Table 4, and discussed towards the beginning of the  
7 results section on “Regression model performance”. The poor performance of the drainage-area ratio method did not  
8 warrant further discussion.

9

1 **Response to Commenter 1**

2 Thank you for your comments. Responses to your comments are provided below.

3 1) The current version of the paper does not show the statistical measures (e.g., F-stat) of the fitted regression  
4 equations.

5 **Response:** Regression model statistics are included in the Supplementary Material (see Regression\_Models.txt), and  
6 two new columns have been added for the F-statistic and its p-value.

7 2) The authors do not provide a substantial evidence (e.g., reference) to convince the adopted equation shown on page  
8 number 9. The authors should mathematically prove. If not, few graphs are required to show the trends.

9 **Response:** References provided for the form of regression model used to predict percentile flows.

10 3) In this paper, the authors develop regional regression models of flow duration curves for the contiguous US. Having  
11 said this, as per the authors, the current literature is based on particular geographic regions of the US, such as  
12 southern New England, southern and central California, and the mid-Atlantic. Therefore, the authors can verify their  
13 results for those geographic regions that have already been researched.

14 **Response:** The performance of regression models for individual basin groups are compared to previous studies of  
15 overlapping geographic regions in the results section on “Regression model performance”.

16 4) The authors should provide some statistical measures (e.g., minimum/ maximum/average geographical area) of the  
17 basins that have been analyzed in this paper.

18 **Response:** The range of important basin characteristics is provided in Table 6, and serves as the limit for applying the  
19 tool for predicting percentile flows (i.e. the CONUS Percentile Flow Predictor).

20 5) This research (i.e., results and the discussion) relies on the tool developed by the authors. Therefore, the results may  
21 not be of useful unless the tool is developed accurately. Having said this, the readers may not be conversant with the  
22 programming language(s) to go through the supplementary material provided by the authors. Therefore, it may not  
23 be feasible for a reader to authenticate the results without going through the source code. Thus, a section to outline  
24 the development of the tool is required.

25 **Response:** The results and discussion were not based on the tool (i.e. the CONUS Percentile Flow Predictor). Rather,  
26 the tool was developed based on the results of the study, and simply accesses the regression models developed for the

1 study to predict percentile flows and report regression model statistics. No programming knowledge is necessary to  
2 operate the tool. The user need only install R, double-click the RData file in the Supplementary Material, and enter three  
3 values in the graphical user interface that appears. None of these steps require any programming knowledge, and we  
4 invite you to use the tool. The output of the tool has been cross-checked using the input values of this study, and any  
5 other input values supplied by the user will generate predictions with a range of uncertainty. These predictions are  
6 intended as an initial approximation of percentile flows, and should not be used for any form of engineering design. The  
7 development of the tool is described in the section titled “Supplementary Material – CONUS Percentile Flow Predictor”,  
8 and instructions for using the tool are provided in a Readme.txt bundled with the Supplementary Material.

9 6) The methodology adopted to determine the optimum number of clusters is not crystal clear. With the current  
10 methodology, the basins that fall within a particular group may not be the same in the chosen methods (i.e., expert,  
11 lump, and distributed). This is also visible by observing the figures 3(a), 3(b), and 3(c). Therefore, with the  
12 methodology adopted to determine the optimum number of clusters, it is meaningless to evaluate the performance  
13 difference between the chosen methods.

14 **Response:** The method used to determine the number of clusters has been clarified. The basins do not need to be in the  
15 same cluster in order to evaluate the *entire* process of developing regional regression models (i.e. identifying basin  
16 groups and constructing regression models for each group). The study aims to evaluate the performance of this entire  
17 process using different sets of independent variables.

18 7) The statistical measures on performance evaluation (e.g., coefficient of determination Nash and Sutcliffe efficiency)  
19 presented in this paper are for validation basins. The paper does not present the statistical measures on the fitted  
20 equations.

21 **Response:** The adjusted  $R^2$  of the fitted equations is presented in Fig. 4, and adjusted  $R^2$  values for each regression  
22 model are given in the Supplementary Material (see Regression\_Models.txt). Statistics on the fit of the regression  
23 models are not represented further in the paper because the focus is on performance of models in validation.

# 1 **Regional regression models of percentile flows for the contiguous** 2 **US: Expert versus data-driven independent variable selection**

3 Geoffrey Fouad<sup>1</sup>, André Skupin<sup>2</sup>, Christina L. Tague<sup>3</sup>

4 <sup>1</sup>Geography Program, Monmouth University, West Long Branch, NJ, USA

5 <sup>2</sup>Department of Geography, San Diego State University, San Diego, CA, USA

6 <sup>3</sup>Bren School of Environmental Science and Management, University of California, Santa Barbara, CA, USA

7 *Correspondence to:* Geoffrey Fouad (gfouad@monmouth.edu)

8 **Abstract.** Percentile flows are statistics derived from the flow duration curve (FDC) that describe the flow equaled or  
9 exceeded for a given percent of time. These statistics provide important information for managing rivers, but are often  
10 unavailable since most basins are ungauged. A common approach for predicting percentile flows is to deploy regional  
11 regression models based on gauged percentile flows and related independent variables derived from physical and climatic  
12 data. The first step of this process identifies groups of basins through a cluster analysis of the independent variables,  
13 followed by the development of a regression model for each group. This entire process hinges on the independent variables  
14 selected to summarize the physical and climatic state of basins. Distributed physical and climatic datasets now exist for the  
15 contiguous United States (US). However, it remains unclear how to best represent these data for the development of regional  
16 regression models. The study presented here developed regional regression models for the contiguous US, and evaluated the  
17 effect of different approaches for selecting the initial set of independent variables on the predictive performance of the  
18 regional regression models. An expert assessment of the dominant controls on the FDC was used to identify a small set of  
19 independent variables likely related to percentile flows. A data-driven approach was also applied to evaluate two larger sets  
20 of variables that consist of either (1) the averages of data for each basin or (2) both the averages and statistical distribution of  
21 basin data distributed in space and time. The small set of variables from the expert assessment of the FDC and two larger  
22 sets of variables for the data-driven approach were each applied for a regional regression procedure. Differences in  
23 predictive performance were evaluated using 184 validation basins withheld from regression model development. The small  
24 set of independent variables selected through expert assessment produced similar, if not better, performance than the two  
25 larger sets of variables. A parsimonious set of variables only consisted of mean annual precipitation, potential  
26 evapotranspiration, and baseflow index. Additional variables in the two larger sets of variables added little to no predictive  
27 information. Regional regression models based on the parsimonious set of variables were developed using 734 calibration  
28 basins, and were converted into a tool for predicting 13 percentile flows in the contiguous US. Supplementary Material for  
29 this paper includes an R graphical user interface for predicting the percentile flows of basins within the range of conditions  
30 used to calibrate the regression models. The equations and performance statistics of the models are also supplied in tabular  
31 form.



## 1 **1 Introduction**

2 The flow duration curve (FDC) is composed of percentile flows that identify the flow equaled or exceeded for a given  
3 percent of time. Percentile flows are used to make decisions for streamflow applications, such as hydropower, wastewater  
4 dilution, and water abstractions (Vogel and Fennessey, 1995). These applications are often conducted without observed  
5 percentile flows as most basins are ungauged. In this case, regionalization procedures are typically adopted to predict  
6 percentile flows based on information from gauged basins.

7 A common type of regionalization procedure develops regression models that relate observed percentile flows to  
8 independent variables derived from physical and climatic basin data (see Hope and Bart, 2011; Mohamoud, 2008; Over et  
9 al., 2014). Hydrologic models based on predicted parameters and climatic forcing data are an alternative to derive percentile  
10 flows (Westerberg et al., 2014). However, the simplicity of using regression models presents an opportunity to provide a tool  
11 to predict percentile flows for ungauged basins.

12 -Regression models are known to perform poorly for study areas with a large variance in percentile flows, such as the  
13 contiguous United States (US). To reduce the variance in percentile flows, separate regression models are developed for  
14 groups of basins in a process called *regional regression modeling* (Sauquet and Catalogne, 2011). A typical regional  
15 regression first splits the basins into groups using cluster analysis and then develops regression models for each group.  
16 Independent variables, such as mean elevation and precipitation, are used to identify the groups and parameters of the  
17 regression models.

18 ~~Despite the long standing tradition of regional regression modeling in hydrology, few studies have investigated the effect of  
19 using different sets of independent variables on the final performance of predictions. Independent variables can be selected  
20 using different approaches. The tendency of recent studies is to use many independent variables in a data-driven approach  
21 (see Di Prinzio et al., 2011; Over et al., 2014; Sauquet and Catalogne, 2011), whereas older studies justify the use of few  
22 variables through expert assessment (see Dingman, 1978; Mimikou and Kaemaki, 1985; Singh, 1971). [This approach has  
23 more potential following the decade on predictions in ungauged basins (Sivapalan et al., 2003) in which a variety of studies  
24 identified key variables related to the overall shape of the FDC (Castellarin et al., 2013). A study comparing recently  
25 developed physical understanding of the FDC to a data-driven approach for selecting independent variables would contribute  
26 valuable information to the problem of identifying a generalized solution to predict the FDC in ungauged basins.]~~

27 Regional regression modeling has been used to predict percentile flows in the US (see Archfield et al., 2007; Hope and Bart,  
28 2011; Mohamoud, 2008). These studies have focused on particular geographic regions of the US, such as southern New  
29 England (Archfield et al., 2007), southern and central California (Hope and Bart, 2011), and the mid-Atlantic (Mohamoud,  
30 2008). ~~[The National Streamflow Statistics Program of the US Geological Survey has developed an application for predicting  
31 percentile flows called StreamStats (Ries, 2007). However, it does not cover the contiguous US, and regression models were  
32 developed for states rather than grouping basins based on characteristics related to flow.] published regional regression  
33 equations for individual states (see Ries (2007) for a summary of the program). Although p~~Previous work, such as

**Comment [GF1]:** Referee 1 – Paragraph added to describe the necessity of the research. Regional regression studies have turned to data-driven approaches, but we have yet to evaluate this practice against an expert assessment of the independent variables.

**Comment [GF2]:** Referee 2 – The purpose of the paper is not to develop a new modeling approach, but to evaluate new understanding of the FDC as summarized in Castellarin et al. (2013) against the increasingly popular data-driven approach to select independent variables. To the knowledge of the authors, this type of comparison has not been performed for the contiguous US, and would represent a valuable contribution towards a generalized solution to predict the FDC.

**Comment [GF3]:** Referee 2 – StreamStats application now acknowledged, and major differences between StreamStats and our approach provided. StreamStats deploys models for states and does not cover the contiguous US, whereas our approach develops models for the contiguous US using basins grouped based on characteristics related to flow.

1 | [StreamStats studies](#) have been performed for parts of the US, [although](#) physical and climatic data now exist to develop  
2 regional regression models for the contiguous US. Independent variables could be derived to cluster basins in the contiguous  
3 US and develop regression models for subsequent groups of basins. The resulting models could be used as a tool to predict  
4 percentile flows for ungauged basins in the contiguous US.

### 5 **1.1 Independent variables for regional regression modeling**

6 Independent variables summarize physical and climatic basin data, and serve as the foundation for regional regression  
7 modeling. Both steps of regional regression modeling (basin grouping and model development) depend on the independent  
8 variables chosen to represent the basins. Despite the importance of independent variables, prior studies have primarily  
9 evaluated the use of different cluster analyses (see Di Prinzio et al., 2011; Laaha and Blöschl, 2006; Sauquet and Catalogne,  
10 2011) and modeling methods (see Archfield et al., 2007; Holmes et al., 2002; Over et al., 2014), rather than the input  
11 information of the overall regional regression approach.

12 A limited number of studies have examined the input information for regional regression modeling of percentile flows.  
13 These studies have either investigated how to select independent variables from a large number of possible variables  
14 (Ssegane et al., 2012a,b) or experimented with the initial set of variables to assess the predictive potential of a certain type of  
15 variable (Hope and Bart, 2012; Ilorme, 2011). A two-part study compared the performance of different variable selection  
16 methods for clustering basins (Ssegane et al., 2012a) and modeling percentile flows (Ssegane et al., 2012b). These studies  
17 revealed the importance of different variables through the variable selection process (i.e. more important variables were  
18 selected more often). The importance of different variables can also be evaluated by changing the initial set of variables and  
19 assessing the difference in model performance. This approach has been used to evaluate the importance of variables  
20 describing vegetation cover (Hope and Bart, 2012) and the spatial distribution of land surface data (Ilorme, 2011). Both of  
21 these studies reported only minor differences to model performance after changing the initial set of variables. However, the  
22 study involving the spatial distribution of land surface data could be expanded to include information on climate and geology  
23 as these are dominant controls on the FDC (Yokoo and Sivapalan, 2011). Studies that evaluate different types of variables,  
24 such as Hope and Bart (2012) and Ilorme (2011), highlight the uncertainty of selecting the initial set of variables for a  
25 regional regression approach.

26 The approach for selecting the initial set of variables has evolved over the long history of regional regression studies. Early  
27 studies used a small number of variables due to the scarcity of spatially distributed data (see Dingman, 1978; Mimikou and  
28 Kaemaki, 1985; Singh, 1971). These studies included all of the variables in the regression models, and attempted to target  
29 variables with a strong physical connection to the FDC. This early approach to selecting variables could be implemented  
30 using contemporary data sources that provide more physical and climatic information. Variables derived from such data  
31 could be selected through an expert assessment of the dominant controls on the FDC.

1 An *expert assessment* of the FDC would select a small number of variables according to a physical understanding of the  
2 curve, which can be summarized as follows: the highest and lowest flows are respectively generated by storms and  
3 subsurface drainage, and flows in between are a mixture of these sources moderated by evapotranspiration losses (summary  
4 based on the work of Yokoo and Sivapalan, 2011). With this understanding, the climatic controls of the FDC could be  
5 summarized by *mean annual precipitation* (MAP) and *potential evapotranspiration* (PET), while subsurface drainage could  
6 be represented by *baseflow index* (BFI) values that describe the percent of streamflow attributed to groundwater discharge. [A](#)  
7 [recent review of the FDC regionalization problem suggests the use of this type of physical understanding to select](#)  
8 [independent variables \(Castellarin et al., 2013\).](#) Although BFI values are derived at gauged points, they can be interpolated  
9 to produce spatially distributed data, such as a gridded product for the contiguous US (Wolock, 2003). This data can then be  
10 used to create independent variables for regional regression models.

**Comment [GF4]:** Referee 2 – Sentence added to reflect guidance from Castellarin et al. (2013).

11 [Despite the recent suggestion to select independent variables based on physical understanding \(Castellarin et al., 2013\),](#)  
12 [many studies of late have opted to use a large number of independent variables \(e.g. Over et al. \(2014\) evaluated 21](#)  
13 [variables\) in a data-driven approach that attempts to account for more complex and nuanced relations to percentile flows](#)  
14 [than may be anticipated through an expert assessment.](#) ~~The growth of spatially distributed data has prompted recent regional~~  
15 ~~regression studies to use a large number of independent variables (e.g. Over et al. (2014) evaluated 21 variables) in a data-~~  
16 ~~driven approach that attempts to account for more complex and nuanced relations to percentile flows than is presumably~~  
17 ~~provided by the limited number of variables identified through expert assessment.~~ All of the variables are first used to cluster  
18 the basins, and then a subset of the variables is selected to model the percentile flows for each group of basins (see Di  
19 Prinzio et al. (2011), Laaha and Blöschl (2006), and Sauquet and Catalogne (2011) for examples). The variables used in  
20 these studies may describe the average of the basin data via a single, *lumped* value or the statistical distribution of the basin  
21 data via multiple, *distributed* values. The latter set of variables describes the spatial distribution of physical data, such as  
22 topography and geology, and the temporal distribution of climatic data. This information describes factors potentially  
23 associated with streamflow generation, such as the variability of subsurface drainage conditions (Tague and Grant, 2004) or  
24 dispersion of precipitation throughout the year (i.e. seasonality; Ye et al., 2012). Distributed variables produce the largest set  
25 of variables for regional regression modeling, and are thought to be advantageous for accommodating a large variety of  
26 relations to the percentile flows.

**Comment [GF5]:** Referee 2 – Description of how recent data-driven studies contrast the suggestion of Castellarin et al. (2013) to select physically-based independent variables.

## 27 **2 Research objective and question**

28 The objective of this research was to create regional regression models for predicting percentile flows in the contiguous US.  
29 The steps to complete this objective included (1) grouping basins and (2) developing regression models for each group of  
30 basins. Both of these steps were based on independent variables that summarized the physical and climatic data of the basins.  
31 The approach used to select the independent variables may influence the performance of the regression models. A small

1 number of variables could be selected according to an expert assessment of the dominant controls on the FDC, or a data-  
2 driven approach could be adopted to account for many possible relations to the percentile flows using a large number of  
3 variables. Both of these approaches were applied to create the regional regression models. The difference in performance  
4 was then evaluated to answer the following research question:

5 How does the performance of regional regression models for predicting percentile flows differ when using an expert  
6 assessment to select a small number of variables versus a data-driven approach involving a large number of variables?

7 The hypothesis investigated in this study was that the data-driven approach would produce better regression models because  
8 the large number of variables may account for nuanced relations to the percentile flows not anticipated by the expert  
9 assessment. A performance evaluation was conducted to test this hypothesis and identify a parsimonious approach for  
10 creating the regional regression models. These models were then used to develop a tool for predicting the percentile flows of  
11 ungauged basins in the contiguous US.

## 12 **3 Methods**

### 13 **3.1 Overview**

14 Regional regression models were created using three different sets of independent variables:

- 15 (1) A limited number of variables identified through *expert assessment*,
- 16 (2) an expanded number of *lumped* variables, and
- 17 (3) a larger number of *distributed* variables.

18 The first set of variables was selected based on the expert assessment outlined in the Introduction, and included MAP, PET,  
19 and BFI (herein referred to as *expert variables*). All of the expert variables were used in the regional regression models.  
20 Larger sets of variables were used in a data-driven approach to identify the regional regression models. A set of lumped  
21 variables was used to describe the averages of data for each basin, while distributed variables described both the average and  
22 distribution of the basin data in space and time. A subset of the lumped and distributed variables was selected for the  
23 regional regression models using a regression tree method called random forests (Breiman, 2001) to rank the predictive  
24 potential of the variables.

25 The different sets of variables were used in a cluster analysis to split the basins into groups. As a precursor to cluster  
26 analysis, the variables were fed through a neural network called the self-organizing map (SOM). This is an increasingly  
27 popular step to reduce noise in hydrologic data (i.e. variance unrelated to the actual value) and account for non-linearities in  
28 the cluster analysis (see Boscarello et al., 2015; Di Prinzio et al., 2011; Toth, 2013). With each basin characterized by  $n$   
29 variables, SOM neural network training transforms  $n$ -dimensional basin vectors into  $n$ -dimensional neuron vectors. Those  
30 neuron vectors then become the subject of multivariate clustering, which ultimately leads to the grouping of basins. The  $k$ -  
31 means clustering method was applied to the neuron vectors as it identifies clusters similar to how the data is organized in the

1 SOM (Skupin, 2004). The basins were then assigned to the neuron clusters using the neuron with the vector that best-  
2 matched the basin data (i.e. best-matching unit).

3 Groups of basins identified based on the SOM were used to develop regression models for predicting percentile flows. This  
4 was accomplished using a set of calibration basins, and an independent set of validation basins was used to evaluate the  
5 performance of the regression models. The entire process of (1) identifying groups of basins, (2) developing regression  
6 models, and (3) evaluating their performance was repeated using the three different sets of independent variables (expert,  
7 lumped, and distributed). The performance evaluation was used to identify a parsimonious set of variables for creating the  
8 regional regression models, and a tool based on these models was developed to predict percentile flows for the contiguous  
9 US. The entire regional regression study is summarized as a flow chart in Fig. 1.

### 10 3.2 Basins and percentile flows

11 All basins used in this study were located in the contiguous US, and were selected based on being classified as “near-  
12 natural” by the US Geological Survey’s GAGES-II database. The near-natural class consists of basins with little human  
13 influences to the flow of water (see Falcone (2011) for more details). Near-natural basins with at least 30 years of continuous  
14 daily streamflow data were used to calculate 13 percentile flows including the high flows exceeded 1 and 5 % of the time  
15 ( $Q_{01}$  and  $Q_{05}$ ), low flows exceeded 95 and 99 % of the time ( $Q_{95}$  and  $Q_{99}$ ), and decile values between those flows ( $Q_{10}$ ,  
16  $Q_{20}, \dots, Q_{90}$ ). Streamflow data was downloaded from the National Water Information System (<http://waterdata.usgs.gov/nwis>).  
17 Daily data for 30 years was used to calculate percentile flows reasonably stable for different time periods (Kennard et al.,  
18 2010). Percentile flows were calculated for 918 near-natural basins using the Weibull plotting position to identify the percent  
19 of time that a given flow was equaled or exceeded ( $p$ ) as follows:

$$20 \quad p = \frac{r}{(n+1)} \times 100 \quad (1)$$

21 where  $r$  is the rank of the daily flow according to its magnitude,  $n$  is the total number of daily flow values, and the flows  
22 were normalized using the mean of nonzero values as in Hope and Bart (2011) to control for differences in magnitude  
23 between the basins.

24 A subset of validation basins was used to evaluate the performance of the regression models. The validation included 184  
25 (20 %) of the basins, which meets the recommendation that the validation should have at least 100 samples for a continuous  
26 dependent variable, such as percentile flows (Harrell, 2001). The sample of validation basins was selected using a “proxy-  
27 basin” approach to identify a sample of basins representative of the remaining calibration basins used to develop the  
28 regression models (Klemeš, 1986). The representative sample was identified using a stratified random sample based on  
29 independent variables to avoid corrupting the validation. The independent variables used to stratify the basins were thought  
30 to be indicative of major controls on the FDC, and consisted of the broadest Köppen climate classes (Peel et al., 2007), the  
31 three major rock types (Reed and Bush, 2007), and drainage area categories. The validation basins were then randomly  
32 selected within the strata, and the remaining calibration basins had a similar distribution of independent variables according

1 to descriptive statistics and statistical tests (Kolmogorov-Smirnov and Mann-Whitney). A map of the calibration and  
2 validation basins is provided in Fig. 2.

### 3 **3.3 Independent variables**

4 Independent variables describing topography, land cover, soil, geology, and climate were used to develop regional regression  
5 models for predicting the percentile flows. Topographic variables were derived from the National Elevation Dataset (NED) 1  
6 arc-second (~ 30-m) grid (<http://ned.usgs.gov>), and the stream channels for calculating additional topographic variables were  
7 acquired from GAGES-II or the National Hydrography Dataset Plus Version 2 (NHDPlusV2) 1:100,000-scale product  
8 (<http://www.nhdplus.com>). Land cover was assessed using the 30-m National Land Cover Dataset (NLCD) for the year 1992  
9 (Vogelmann et al., 2001), as this was the year of the NLCD that coincided with streamflow data from the most basins. The  
10 NLCD was used to calculate percent forest cover since synthesis of paired catchment experiments identifies a strong relation  
11 between forest cover and annual flow (Brown et al., 2005). Soil variables were calculated using a multilayer soil  
12 characteristics dataset for the contiguous US (CONUS-SOIL), which provides the State Soil Geographic Database  
13 (STATSGO) as 1-km grids (Miller and White, 1998). Geology was summarized using the BFI as the two are known to be  
14 strongly correlated (Price, 2011). Estimates of BFI were previously generated by Wolock (2003) for the contiguous US  
15 (BFI48GRD). The 1-km grid was spatially interpolated using BFI values at 8,249 gauges with at least ten years of daily  
16 streamflow data (see Wolock (2003) for more information on the methodology). Although the BFI grid was produced using  
17 gauged data, it is a pre-existing dataset that can be used to create independent variables for predicting the percentile flows of  
18 ungauged basins, as previously demonstrated (Dudley, 2015; Hope and Bart, 2011; Yuan, 2013).

19 Climatic variables were calculated using 30 years of the *Precipitation-elevation Regressions on Independent Slopes Model*  
20 (PRISM) 4-km grids (<http://prism.oregonstate.edu>). The only exception was a GAGES-II variable for the average percent of  
21 precipitation delivered as snow from 1901-2000 (Percent\_Snow). The other climatic variables used monthly PRISM data  
22 concurrent with the streamflow data for each basin or daily PRISM data from 1981-2010 as the daily data was unavailable  
23 for all of the streamflow data and the chosen time period overlapped with the most streamflow data. Precipitation depths  
24 (mm) were weighted according to the fraction of the grid cell located within the basin boundary.

25 The independent variables were organized into three different sets of variables listed in Table 1 and named *expert* (E),  
26 *lumped* (L), and *distributed* (D). These different sets of variables may include some of the same variables, but the number of  
27 variables increased for each successive dataset. The expert variables included MAP, PET, and BFI based on expert  
28 assessment of the FDC, as discussed in the Introduction. The larger sets of 22 lumped and 37 distributed variables were used  
29 for a data-driven approach to identify the regional regression models. The lumped variables mainly described the average of  
30 the basin data, while the distributed variables expanded on this information using the following types of variables: (1) the  
31 standard deviation of gridded physical data, such as elevation, and annual climatic statistics, such as precipitation intensity  
32 ( $\text{mm d}^{-1}$ ), (2) the percent forest cover in riparian corridors since they are critical areas for groundwater discharge (Hope et al.,

1 2009), and (3) the amplitude and peak timing of monthly precipitation and PET data described using the lag-1  
2 autocorrelation coefficient (Toth, 2013), circular statistics (Dingman, 2002), and first term of the Fourier transform (Dalton,  
3 2005).

#### 4 **3.4 Cluster analysis**

5 Individual basins are assigned to groups through cluster analysis of independent variables converted into z-scores with a  
6 mean of zero and variance of one in order to give variables on different scales comparable weight. The z-scores were used as  
7 the weights of input vectors for training the SOM, which was composed of hexagonal neurons (i.e. each neuron has six  
8 neighbors) arranged in a two-dimensional grid. The number of neurons in the grid was chosen to be significantly larger than  
9 the anticipated number of clusters in order to avoid individual neurons acting as cluster centroids. Neurons are later linked to  
10 basins through computation of the similarity of basin input vectors and neuron output vectors. “Empty” neurons not linked to  
11 any of the basins through strong similarity were deemed unrepresentative of the input data, and limited for the cluster  
12 analysis. Preliminary experiments were performed on the total number of neurons in order to limit the occurrence of empty  
13 neurons, and this led to the choice of a 15x15-neuron SOM for all training.

14 Prior to training, the neurons were given a random vector of values equal in length to the number of input variables. The  
15 neuron vectors were adjusted through an iterative training process that presented the basin data to the SOM and assigned it to  
16 the most similar neuron according to the Euclidean distance metric. The receiving neuron, or best-matching unit (BMU), and  
17 its neighbors were modified to more closely match the incoming data using a Gaussian neighborhood function and a learning  
18 rate that decreased the magnitude of the modifications as the training proceeded. Neural network training was performed  
19 with the SOM Toolbox (<http://www.cis.hut.fi/projects/somtoolbox>), using techniques described by Vesanto et al. (2000).

20 The SOM was trained using a global and local stage as recommended by Kohonen (1990). The global stage used a large  
21 neighborhood size (8 neurons), relative to the size of the SOM (15x15 neurons). A large learning rate (0.04), which  
22 decreased over a short number of runs (50), was used during global training to reveal large structures in the data. Smaller  
23 clusters were then distinguished using a smaller neighborhood (5 neurons) and learning rate (0.03) for a longer number of  
24 runs (4,000) during local training. Both training stages were run until the neuron vectors converged on the basin data (i.e. the  
25 difference between the neurons and basins no longer decreased).

26 The trained neuron vectors were then clustered using the *k*-means method. Cluster centroids were initially given a random  
27 vector of values, and the neuron vectors were assigned to the cluster centroids according to the Euclidean distance metric.  
28 The cluster centroids were then recalculated using the mean of the neuron vectors assigned to each cluster. This process  
29 continued until the cluster centroids no longer changed, and was repeated 1,000 times to prevent the randomly initiated  
30 cluster centroids from influencing the performance of the clustering. The final cluster solution had the minimum sum of  
31 squared Euclidean distances between the cluster centroids and neuron vectors. The basins were assigned to the neuron  
32 clusters according to their BMU (i.e. neuron with the shortest Euclidean distance to the basin).

1 The number of clusters was evaluated for the cluster solutions with 2-50 clusters. The criteria for evaluating the number of  
2 clusters were (1) the number of calibration basins per cluster available to develop subsequent regression models and (2) the  
3 validity of the clusters in terms of their compactness and separation. The final number of clusters was determined as follows:

4 (1) The number of clusters for each set of variables was identified using five cluster validity indices (i.e. silhouette,  
5 Davies-Bouldin, Xie-Beni, Calinski-Harabasz, and Dunn) as defined in Desgraupes (2013).

6 (2) Cluster solutions from the validity indices with less than 20 calibration basins per cluster were eliminated as  
7 recommended by Hosking and Wallis (1997).

8 (3) The largest number of clusters remaining was used to accommodate the large variability of basins in the contiguous  
9 US.

10 ~~The minimum number of calibration basins per cluster was 20 as recommended by Hosking and Wallis (1997) for regional~~  
11 ~~streamflow predictions. This served as a limit on the number of clusters. The validity of the different number of clusters was~~  
12 ~~evaluated using the following indices defined as in Desgraupes (2013): silhouette, Davies-Bouldin, Xie-Beni, Calinski-~~  
13 ~~Harabasz, and Dunn. The number of clusters identified using the indices was limited to solutions that returned at least 20~~  
14 ~~basins per cluster. From these solutions, the largest number of clusters was chosen to contend with the large variability of~~  
15 ~~basins in the contiguous US. The different sets of variables (Table 1) resulted in different numbers of clusters, and the largest~~  
16 ~~number was chosen so that each set of variables had the same number of clusters. The cluster analysis for each set of~~  
17 ~~variables split the basins into 14 groups.~~

### 18 3.5 Regression model development

19 Regression models were developed for each group of basins. The number of calibration basins in the group dictated the  
20 number of independent variables used for the model. An independent variable was used for every ten calibration basins as  
21 this provides an adequate sample size for estimating regression model parameters (Austin and Steyerberg, 2015). The  
22 regression models were able to use all three of the variables from the expert assessment of the FDC (> 30 calibration basins  
23 per group), but a subset of the larger sets of variables (lumped and distributed) had to be selected for the regression models.

24 The lumped and distributed variables were selected using random forests because this approach can be used to estimate the  
25 importance of each variable. Random forests were generated for each group using the calibration basins and their percentile  
26 flows. The calibration basins were randomly sampled to grow regression trees until the error of the percentile flow  
27 predictions stabilized for the out-of-bag sample (i.e. calibration basins excluded from the tree). The regression trees  
28 recursively split the calibration basins into smaller groups using a series of rules based on the independent variables. The  
29 percentile flows of the smallest groups were averaged to generate predictions for the out-of-bag sample. The mean squared  
30 error (MSE) of out-of-bag predictions was used as an estimate of variable importance. Each variable was randomly permuted  
31 (or essentially removed) to grow the regression trees, and the increase in MSE signified the importance of the variable. The  
32 variable rankings derived from this process may change due to the random samples used to grow the regression trees. As a

**Formatted:** List Paragraph, Numbered +  
Level: 1 + Numbering Style: 1, 2, 3, ... + Start  
at: 1 + Alignment: Left + Aligned at: 0.25" +  
Indent at: 0.5"

**Comment [GF6]:** Commenter 1 – Process of  
selecting the number of clusters clarified.



1 result, the entire process was repeated using 100 random forests, and the mean increase in MSE was used to rank the lumped  
 2 and distributed variables for each group of basins. The lowest ranked variable included in the regression model was  
 3 determined by the number of calibration basins in the group as previously described.

4 **The independent variables selected for each group of basins were used in a common form of a regression model of the**  
 5 **form for predicting FDC statistics (see Mohamoud, 2008; Over et al., 2014; Sauquet and Catalogne, 2011);**

$$6 \ln(Q_i) = \beta_0 + \beta_1 I_1 \dots + \beta_j I_j \quad (2)$$

7 where the dependent variable ( $Q_i$ ) is the percentile flow  $i$  transformed using the natural log to reduce the skew of the flows  
 8 and their potential to violate the assumption of homoscedasticity (i.e. evenly varying model residuals),  $I_1 - I_j$  are the  
 9 untransformed or natural log-transformed independent variables whether they had a non-linear or linear relation to the  
 10 percentile flow  $i$ , and  $\beta_0 - \beta_j$  are the parameters of the regression model estimated using the ordinary least squares method.

11 Separate regression models were developed to predict each of the 13 percentile flows ( $Q_{01}, Q_{05}, Q_{10}, Q_{20}, \dots, Q_{95}, Q_{99}$ ). **This**  
 12 **modeling approach did not guarantee an ordinal relation between predicted percentile flows. Overestimates violating the**  
 13 **ordinal relation between percentile flows were reflected in the performance evaluation, but not explicitly evaluated. Another**  
 14 **possible limitation of the regression approach is that it did not account for the influence of outliers. Diagnostics, such as**  
 15 **Cook's D and DFFITS, are used to identify outliers, and if an error is detected, the value is either corrected or removed.**  
 16 **Although the use of such diagnostics is recommended for hydrologic regression modeling (Helsel and Hirsch, 2002), many**  
 17 **regional regression modeling studies choose not to account for outliers (see Castellarin et al., 2004; Mohamoud, 2008; Over**  
 18 **et al., 2014), likely due to the difficulty of characterizing an outlier as an error. Any outliers were included in the regression**  
 19 **modeling for the purpose of comparing different sets of independent variables without manually adjusting the data.**

### 20 3.6 Performance evaluation

21 The performance of the regional regression models was evaluated using the percentile flows of the validation basins  
 22 excluded from regression model development. The natural log of the percentile flows was applied to reduce the potential  
 23 influence of large flows. The predictive performance for each percentile flow was quantified using the relative error (E),  
 24 coefficient of determination ( $R^2$ ), and Nash and Sutcliffe (1970) efficiency (N) calculated as:

$$25 E = \left| \frac{P_b - O_b}{O_b + 1} \right| \quad (3)$$

$$26 R^2 = \left( \frac{\sum_{b=1}^n (O_b - \bar{O})(P_b - \bar{P})}{\sqrt{\sum_{b=1}^n (O_b - \bar{O})^2} \sqrt{\sum_{b=1}^n (P_b - \bar{P})^2}} \right)^2 \quad (4)$$

$$27 N = 1 - \frac{\sum_{b=1}^n (O_b - P_b)^2}{\sum_{b=1}^n (O_b - \bar{O})^2} \quad (5)$$

28 where  $O_b$  and  $P_b$  are respectively the observed and predicted percentile flow for basin  $b$ ,  $\bar{O}$  and  $\bar{P}$  are the mean of the  
 29 observed and predicted percentile flows, respectively, and  $n$  is the number of validation basins. A constant of one was added

**Comment [GF7]:** Commenter 1 – References for the form of the regression model provided.

**Comment [GF8]:** Referee 1 – Limitation of modeling approach regarding the ordinal relation between percentile flows acknowledged here, and revisited in the discussion section on "Improving performance of percentile flow predictions".

**Comment [GF9]:** Referee 2 – Limitation of not screening outliers recognized. Although screening outliers may improve regression model performance, a possible reason why many studies, including this one, do not screen for outliers is the difficulty of characterizing an outlier as an error and then manually adjusting that error. This subject is revisited in the discussion section on "Improving performance of percentile flow predictions".

1 to the denominator of E to accommodate zero flows, and the absolute value was used to calculate the sum of E for each  
2 percentile flow.

### 3 **4 Results**

4 The study basins were split into 14 groups using three different sets of variables (Fig. 3). The groups were largely  
5 geographically contiguous, although the independent variables did not describe the location of the basins. The geographic  
6 contiguity of the groups signifies that spatial proximity is a strong indicator of similarity between the independent variables.  
7 Notable exceptions were distant areas with similar physical and climatic conditions, such as southern Appalachia and  
8 northern California (group 6 of Figs. 3a and b), and mountainous areas with sharp changes in elevation, such as the Pacific  
9 Northwest (groups 5 and 10 of Fig. 3). The groups derived using the different sets of variables had some major differences,  
10 such as an additional group for the Rocky Mountains when information on snow (Percent\_Snow) was included (group 13 of  
11 Figs. 3b and c) and the loss of a group in the Appalachian Mountains (group 9 of Figs. 3a and b) when using the distributed  
12 variables. The differences between the groups could be further characterized by an exploratory analysis like that of Ley et al.  
13 (2011), but the present study was concerned with the effect of using the different sets of variables on regional regression  
14 models for predicting percentile flows. The rest of the results therefore examine the independent variables used for the  
15 regression models, and compare the performance of the regression models developed using the different sets of variables to  
16 evaluate the hypothesis that a data-driven approach with a large number of variables is more effective than an expert  
17 assessment of the FDC that uses a small number of variables.

#### 18 **4.1 Independent variables selected for the regression models using random forests**

19 The data-driven approach used random forests to select a subset of the most important lumped or distributed variables for the  
20 regression models, and the percent of the models that included each variable was used to rank the importance of the variables  
21 for predicting high ( $Q_{01}$ - $Q_{20}$ ), average ( $Q_{30}$ - $Q_{70}$ ), and low ( $Q_{80}$ - $Q_{99}$ ) percentile flows (Table 2). The most frequently selected  
22 variable was BFI. The expert assessment of the FDC identified BFI as an important variable for flows other than the highest  
23 flows generated by storms, but BFI was the most important variable for predicting the entire FDC including the highest  
24 flows. The other variables selected by the expert assessment of the FDC (MAP and PET) were among the top five most  
25 selected variables. These variables were also frequently used when combined as Aridity (PET/MAP).

26 The remaining frequently selected variables in Table 2 described snow accumulation and melt (Percent\_Snow and  
27 Spring\_Temp), subsurface drainage (Poorly\_Drained), and mean elevation (Elev). The snow-related variables were  
28 frequently used for snow-dominated groups. For instance, the Rocky Mountains (groups 12 and 13) included the snow-  
29 related variables in 62 % of the models. The importance of subsurface drainage was previously highlighted by BFI, and is  
30 further demonstrated by the frequent use of a variable describing the percent of the basin covered in poorly drained (NRCS

1 (2007) groups C and D) soils (Poorly\_Drained). Mean elevation was frequently used for the regression models, but other  
2 topographic variables, such as mean slope and drainage density, were not frequently used, which is noteworthy as these  
3 variables have been widely used to predict percentile flows.

4 The distributed variables included additional variables for describing the within-basin statistical distribution of independent  
5 variables, but these variables were largely absent from the regression models (Table 2). Only two of these variables  
6 (Precip\_Seasonality and Aridity\_SD) were among the top five most selected variables. This indicates that using the  
7 distributed variables had little effect on the performance of the regression models (see the next section for those results). The  
8 more frequently used lumped variables (i.e. basin averages) were stronger predictors of the percentile flows, and the  
9 additional variables on the distribution of the basin data may have been statistically redundant (i.e. cross-correlated with the  
10 lumped variables).

11 The statistical redundancy (i.e. multicollinearity) of the variables was evaluated using the condition number (CN) of the  
12 regression models (Belsley et al., 2004), with a CN > 30 signifying the presence of ~~redundant variables~~ multicollinearity. All  
13 of the regression models included ~~redundant variables~~ multicollinearity as indicated by the minimum CN > 30 (Table 3). A  
14 large CN may be a problem for transferring the regression model to new (validation) data (Kroll and Song, 2013), ~~but +~~ This  
15 was not ~~a concern~~ considered here since the validation used a representative sample of the basins, ~~and multicollinearity is less~~  
16 ~~of a concern for regression model performance when this condition is met (Baguley, 2012).~~ The CN was used here to  
17 evaluate the ~~redundancy-multicollinearity~~ of the variables with the greatest predictive potential selected for the regression  
18 models. These variables ~~were highly redundant~~ had large multicollinearity, and the degree of ~~redundancy-multicollinearity~~  
19 increased for the distributed variables according to the mean CN. This once again indicates that the distributed variables  
20 added little predictive information to the regression models (i.e. the extra variables were statistically redundant), and the  
21 contribution of the distributed variables to the performance of the regression models is evaluated in the following section.

## 22 4.2 Regression model performance

23 The performance of the regression models was evaluated to identify a parsimonious set of variables (expert, lumped, or  
24 distributed) and create a tool for predicting percentile flows in the contiguous US. Regression model performance in  
25 calibration (goodness-of-fit) was assessed using adjusted  $R^2$  to compare models with a different number of independent  
26 variables. The distribution of adjusted  $R^2$  values is shown in Fig. 4. The smallest adjusted  $R^2$  values of the regression models  
27 were produced using the smallest set of variables (expert), while the larger sets of variables (lumped and distributed) had  
28 similar adjusted  $R^2$  values. Although adjusted  $R^2$  considers the number of variables in a model, it can still favor larger models  
29 (Greene, 2003). Calibration performance as measured by adjusted  $R^2$  was influenced by the number of variables in the  
30 models. An adjusted  $R^2 \geq 0.75$  (“good” according to Castellarin et al., 2004) was obtained by 3.3, 11.0, and 13.7 % of the  
31 models developed using the expert, lumped, and distributed variables, respectively. The same order of variables explained

**Comment [GF10]:** Referee 1 – Multicollinearity addressed here, and further remarks on this matter added to discussion section on “Improving performance of percentile flow predictions”.

1 over half of the variance in the percentile flows for 25.8, 62.1, and 61.0 % of the models. The median adjusted  $R^2$  of the  
2 models developed using the expert, lumped, and distributed variables was respectively 0.34, 0.57, and 0.58.

3 The predictive performance of the regression models was evaluated using validation basins and summarized for each  
4 percentile flow using the sum of absolute relative error (E),  $R^2$ , and Nash-Sutcliffe efficiency (N) (Table 4). Smaller E values  
5 signify better predictive performance, whereas  $R^2$  and N have a maximum of 1 indicating perfect performance. The  
6 regression models were compared to a simple drainage-area ratio (DAR) method in which the drainage area of the validation  
7 basin is divided by the drainage area of the nearest calibration basin and then multiplied by the flow of the nearest calibration  
8 basin (Over et al., 2014). The DAR method represents a baseline for comparing the more complex regression models.  
9 Performance of the DAR method was less than any of the regional regression modeling approaches. For this reason, the  
10 DAR method will not be discussed further.

11 The sum of absolute E was largest for the highest percentile flow ( $Q_{01}$ ) and smallest for the lowest percentile flow ( $Q_{99}$ ), and  
12 likely influenced by the magnitude of the flow. The other performance metrics ( $R^2$  and N) summarized the predictive  
13 performance for the percentile flows independent of their magnitude. The N values were slightly less than the  $R^2$  values, and  
14 ranged from 0.39-0.76. Predictive performance peaked toward the middle of the FDC (average flows), and declined at the  
15 tails (high and low flows).

16 The different approaches for selecting the independent variables (expert assessment or data-driven) influenced the  
17 performance of the regression models. The data-driven approach performed better using the lumped variables, as opposed to  
18 the distributed variables, for almost all of the percentile flows (Table 4). Therefore, the additional information of the  
19 distributed variables (i.e. the statistical distribution of the basin data) did not contribute to the performance of the regression  
20 models. This may be because the additional information was statistically redundant (Table 3) or produced variables that were  
21 not strong predictors of the percentile flows (Table 2).

22 The hypothesis that the data-driven approach would outperform the expert assessment of the FDC was contradicted by the  
23 predictive performance for the percentile flows. Although the data-driven approach performed better in calibration (Fig. 4),  
24 expert assessment of the FDC achieved similar performance to the data-driven approach in validation (Table 4). The  
25 percentile flows at the tails of the FDC (high and low flows) were predicted better using the three variables of the expert  
26 assessment, whereas the larger set of lumped variables slightly improved the predictions for the percentile flows in the  
27 middle of the FDC. The three variables of the expert assessment (MAP, PET, and BFI) explained most of the variance in the  
28 percentile flows, and little to no additional variance was explained using the larger sets of variables for the data-driven  
29 approach.

30 The expert assessment required less computational effort (i.e. calculating and selecting variables), and produced simple  
31 regression models that only need three values to predict the percentile flows for ungauged basins. These models had similar  
32 overall performance to the more complex data-driven models according to the sum of absolute E and mean  $R^2$  and N for all  
33 the percentile flows (Table 5). The performance of the expert assessment was lower than prior work for southern New

**Comment [GF11]:** Referee 2 – Drainage-area ratio method added to initial performance comparison. It performed poorer than the regression models, and was ruled out from further consideration.

1 England (Archfield et al., 2007) and the mid-Atlantic (Mohamoud, 2008) with  $R^2$  and N values of approximately 0.9.  
2 However, these prior works were conducted with a smaller sample of validation basins. The expert assessment had a mean  
3 absolute E of 0.06 for  $Q_{80}$  in the basin group including southern and central California, which was smaller (better) than a  
4 previous study in that region (Hope and Bart, 2011).]

5 [A number of statewide studies have been conducted to build the StreamStats application mentioned in the Introduction (Ries,  
6 2007). StreamStats and associated studies express uncertainty as the 90 % confidence interval of the estimate, but do not  
7 report the performance of regression models in validation. A comparison of StreamStats and the expert assessment at the  
8 validation basins of this study could not be performed because the validation basins have the type of long-term gauges (>30  
9 years of continuous daily data) used to develop StreamStats. An independent validation analysis of StreamStats and the  
10 expert assessment introduced here should be the subject of future work since the focus of this study was to compare different  
11 approaches for selecting independent variables. The outcome of this was that expert assessment was identified as a  
12 parsimonious approach for creating regional regression models due to its simplicity and overall performance. Regression  
13 models based on the expert assessment were used to develop a tool for predicting percentile flows of the contiguous US (see  
14 the Supplementary Material section), which could be compared to StreamStats in a subsequent study. Due to the simplicity  
15 and overall performance of the expert assessment, it was identified as a parsimonious approach for creating the regional  
16 regression models, and these models were used to develop a tool for predicting the percentile flows in the contiguous US  
17 (see the Supplementary Material section).

## 18 5 Discussion

### 19 5.1 Important variables for predicting the FDC

20 The most important variable for predicting the entire FDC was BFI (Table 2). The expert assessment of the FDC linked BFI  
21 to average and low flows at least partially supplied by subsurface drainage (Yokoo and Sivapalan, 2011), but BFI may also  
22 be related to the excess precipitation of a basin (MAP-PET), explaining its ability to predict high flows. Larger BFI values  
23 and high flows may be expected for basins with more excess precipitation, and excess precipitation had a statistically  
24 significant ( $p$ -value < 0.01) correlation with BFI and the representative high flow of  $Q_{10}$  (Spearman's rho of 0.39 and 0.49,  
25 respectively). The baseflow of a basin may therefore be indirectly related to its potential to produce high flows. This is in  
26 line with previous findings that the process of infiltration, a major control of baseflow, also plays a part in controlling floods  
27 (see Gioia et al. (2012) among others).

28 The top five most selected variables of Table 2 included the other variables from the expert assessment of the FDC (MAP  
29 and PET). A substitute for these variables may be Aridity (PET/MAP) since it was also frequently selected. Aridity is a  
30 measure of the long-term water balance that generally represents the proportion of incoming precipitation lost to  
31 evapotranspiration. High to low flows of the FDC were related to Aridity because it influences antecedent moisture and  
32 subsurface drainage. Antecedent moisture moderates the higher flows generated by storms (Muneepeerakul et al., 2010),

**Comment [GF12]:** Commenter 1 – Comparison of regression model performance to previous regional studies added.

**Comment [GF13]:** Referee 2 – Paragraph added to address suggestion regarding comparing StreamStats to the present approach. Unfortunately, this was not possible using the validation basins of this study since they all have long-term gauges with greater than 30 years of continuous data used to develop the models of StreamStats. A future study should compare StreamStats to the tool provided in the Supplementary Material section of this paper.

1 whereas subsurface drainage provides the lower flows between storms (Botter et al., 2008). The long-term water balance  
2 expressed as Aridity has been linked to the variation of the FDC in the contiguous US (Cheng et al., 2012), and may be a  
3 more effective means of representing MAP and PET.

4 Other important variables for predicting the FDC (Table 2) included variables representing snow accumulation and melt  
5 (Percent\_Snow and Spring\_Temp), subsurface drainage (Poorly\_Drained), and mean elevation (Elev). Snow accumulation  
6 and melt were important for snow-dominated basins, and closely associated with high flows generated by spring snowmelt  
7 (Rosenberg et al., 2013). Subsurface drainage represented via poorly drained soils was most strongly related to the low  
8 flows. A larger percent of poorly drained soils with less subsurface drainage reduced the low flows as illustrated by the  
9 statistically significant ( $p$ -value  $< 0.01$ ) negative correlation between Poorly\_Drained and  $Q_{90}$  (Pearson's  $r$  of  $-0.38$ ).  
10 Elevation is an integrative variable that was likely important because it covaries with other important factors, such as  
11 precipitation (Daly et al., 2008), snow accumulation and melt (Grünwald et al., 2014), and subsurface drainage (Schaller  
12 and Fan, 2009).

13 Largely absent from the important variables listed in Table 2 are the distributed variables that describe the statistical  
14 distribution of spatial and temporal basin data. This is either because basin averages provide better information for predicting  
15 percentile flows (Table 2) or distributed variables mainly add redundant information to the regression models (Table 3).

## 16 **5.2 Improving performance of percentile flow predictions**

17 The performance of the regression models was strongest for percentile flows in the middle of the FDC (average flows) and  
18 poorest for percentile flows toward the tails of the FDC (high and low flows). This is a commonly noted pattern in other  
19 FDC regionalization studies (see Hope and Bart, 2012; Mohamoud, 2008; Sauquet and Catalogne, 2011). Poorer  
20 performance toward the tails may be attributed to the large variability of basin responses to storms that generate high flows  
21 and the challenge of representing the contribution of subsurface drainage to low flows (Salinas et al., 2013).

22 The predictive performance for the high and low flows may have been improved by using additional independent variables.  
23 High flows are the product of storms, which were represented by intensity ( $\text{mm d}^{-1}$ ) and maximum events (largest 1-day  
24 totals). However, these variables (Precip\_Intensity and Precip\_ID\_Max) were not frequently used for the regression models  
25 (Table 2), and additional information on the frequency and magnitude of storms may have been useful. This information  
26 could be represented using a precipitation duration curve (PDC) derived like a FDC. The PDC has previously been effective  
27 at reconstructing the high end of the FDC (Yokoo and Sivapalan, 2011), and may be equally effective at yielding  
28 independent variables (i.e. precipitation percentiles) for predicting high flows. The frequency of rainy days (e.g. rainy days  $y^{-1}$ )  
29 may also be informative as an indicator of average antecedent moisture conditions, which mediate the high flows  
30 generated by storms. Physical factors also play a role in mediating high flows through interception and infiltration. Land  
31 cover provides readily available information on these physical factors, but may have been underrepresented in this study.  
32 Percent forest cover (Forest) was the only land cover variable, and it was not frequently used to predict high flows (Table 2).

1 Additional land cover variables specifically targeting the processes of interception (e.g. tree canopy density) and infiltration  
2 (e.g. natural impervious area) may have improved high flow predictions. Such variables could be developed using remote  
3 sensing technology and evaluated for their potential to predict high flows.

4 Additional independent variables may also have benefited the prediction of low flows controlled by subsurface drainage.  
5 Variables describing subsurface drainage (BFI and Poorly\_Drained) were among the most strongly associated variables to  
6 low flows (Table 2). Subsurface drainage could be further characterized using a hydrologically relevant geologic  
7 (hydrogeologic) classification. A hydrogeologic classification of the Pacific Northwest was previously linked to summer low  
8 flows (Tague and Grant, 2004), and this prompts the hypothesis that groups of basins identified using a hydrogeologic  
9 classification may improve subsequent low flow predictions. Subsurface drainage may also be characterized by the storage  
10 properties of regional aquifers. These properties (e.g. aquifer thickness) have been mapped for regional aquifers using spatial  
11 interpolation methods (see Williams and Dixon (2015) among others), and may indicate the contribution of aquifers to low  
12 flows. The low flows of this study included zero flows, which are notably difficult to predict (Snelder et al., 2013) and may  
13 require modeling schemes designed to accommodate intermittent streams (Hope and Bart, 2011).

14 The uncertainty of the percentile flow predictions may be attributed to the ~~use of~~ regression modeling approach. An ordinal  
15 relation between predicted percentile flows may not have been preserved by the regression modeling approach, and a method  
16 to prevent this type of error, such as discarding non-ordinal predictions and replacing them with a linear interpolation  
17 between ordinal values, may improve the performance of predicting individual percentile flows. Regression models are  
18 sensitive to outliers and measurement noise (i.e. errors) in the data (Harrell, 2001). Outliers can be identified using  
19 diagnostics, such as Cook's D and DFFITS, but characterizing the outliers as errors and adjusting them is a difficult and  
20 uncertain task. Furthermore, if an outlier is truly part of the data, a more complex modeling approach to accommodate  
21 outliers may be necessary. Anomalous values, such as outliers or noise, Outliers may be given less weight using machine  
22 learning methods, such as neural networks, capable of smoothing the data (Dawson and Wilby, 2001). Neural networks are  
23 also known for their ability to capture the non-linear relations of hydrologic data (Abrahart and See, 2007), and should be  
24 evaluated for the modeling of percentile flows. The regression modeling approach did not address the large multicollinearity  
25 of the independent variables (Table 3). Multicollinearity could have reduced the performance of the regression models.  
26 Methods for managing multicollinearity in the context of regression, such as model screening, principal component  
27 regression, and partial least squares regression, have proven ineffective at improving model performance (Kroll and Song,  
28 2013). Machine learning methods, like random forests, may be more tolerant to multicollinearity (Dormann et al., 2013), and  
29 as a result, produce models that can be transferred to new basins with more confidence. Machine learning represents a large  
30 suite of methods to potentially deal with outliers and multicollinearity. Despite the potential advantages of machine learning  
31 methods, R regression was applied in this study to produce simple models, which could then be converted into a tool for  
32 predicting percentile flows in the contiguous US (see the next section on Supplementary Material).

**Comment [GF14]:** Referee 1 – Preserving an ordinal relation between predicted percentile flows discussed here as a means to improve predictions.

**Comment [GF15]:** Referee 2 – Discussion of outliers revisited, with a potential method for handling outliers suggested.

**Comment [GF16]:** Referee 1 – Here is additional discussion of multicollinearity and possible approach for managing it.

1 The expert assessment may have been improved by combining MAP and PET as Aridity since this variable was an effective  
2 substitute frequently used in the data-driven regression models (Table 2). The third variable of the expert assessment could  
3 then target the more challenging to predict high or low flows. For instance, the high flows may be explained using a variable  
4 describing the variability of large storms (e.g. slope of the PDC above the 20<sup>th</sup> percentile), and the low flows may be  
5 associated with the percent of the basin underlain by a general hydrogeologic class, such as unconsolidated material.  
6

## 7 **6 Supplementary Material – CONUS Percentile Flow Predictor**

8 The Supplementary Material for this paper provides the contiguous US (CONUS) Percentile Flow Predictor, an open source  
9 R graphical user interface for predicting 13 percentile flows ( $Q_{01}$ ,  $Q_{05}$ ,  $Q_{10}$ ,  $Q_{20}$ , ...,  $Q_{95}$ ,  $Q_{99}$ ) of ungauged basins. The tool uses  
10 regression models developed based on 734 calibration basins in the contiguous US and a set of parsimonious independent  
11 variables identified through expert assessment of the FDC. Input data includes MAP and PET calculated using long-term  
12 PRISM data (<http://prism.oregonstate.edu>) and BFI based on a grid for the contiguous US  
13 (<http://water.usgs.gov/lookup/getspatial?bfi48grd>). For convenience, MAP and PET grids have been calculated using data  
14 from 1981-2010, and are provided with the aforementioned BFI grid in the Supplementary Material. Input data should be  
15 within the range of the data used to create the CONUS Percentile Flow Predictor (Table 6), and a warning is generated if the  
16 input data is outside of this range.

17 The percentile flows of the ungauged basin are predicted by first assigning the basin to a group (Fig. 3a) and then solving the  
18 regression equations for the assigned group. The groups were identified using the SOM, and the ungauged basin is assigned  
19 to the SOM neuron with the shortest Euclidean distance between the neuron vector and input data. The group membership of  
20 the neuron is then used for the ungauged basin. The regression models of that group are used to predict the percentile flows.  
21 The percentile flows were normalized using the mean of nonzero daily flows (i.e. the index flow) and natural log-  
22 transformed to develop the regression models. The predictions are converted into cubic meters per second using the index  
23 flow and the Duan (1983) smearing estimate to back transform the percentile flows. The index flow is predicted using  
24 regression models developed the same way as the percentile flows. Output of the tool can be generated for multiple  
25 ungauged basins, and the predictions are accompanied by statistics on the performance of the regression models (adjusted  $R^2$ ,  
26 CN, and standard error (SE) of the model). The predicted percentile flows can be used to reconstruct the complete FDC  
27 through an interpolation method such as the one in Mohamoud (2008). The CONUS Percentile Flow Predictor is provided  
28 with a metadata file (Readme.txt) including instructions on how to use the tool. Regression models used to create the  
29 CONUS Percentile Flow Predictor are provided with associated statistics in tabular form for use in a variety of software  
30 packages.



## 1 **7 Conclusions**

2 Regional regression models were developed to predict percentile flows for the contiguous US. The two steps of a regional  
3 regression (i.e. identifying groups of basins and developing models) depend on the independent variables used to summarize  
4 the physical and climatic data of the basins. This study compared the following two approaches for selecting the independent  
5 variables: (1) an expert assessment of the factors that control the FDC to identify a small number of variables and (2) a data-  
6 driven approach with many variables possibly linked to the FDC. The data-driven approach was performed using lumped  
7 variables (i.e. basin averages) and a larger set of distributed variables (i.e. basin averages and statistical distribution). The  
8 predictive performance of the regression models was evaluated to identify the most parsimonious approach for selecting  
9 independent variables.

10 An underlying hypothesis of this study was that the data-driven approach would produce better regression models for  
11 predicting the percentile flows. This was contradicted by the results of the performance evaluation. The predictive  
12 performance of the expert assessment (mean  $N = 0.66$ ) was similar to the data-driven approach using the lumped variables  
13 (mean  $N = 0.65$ ) and slightly better than the data-driven models derived from the distributed variables (mean  $N = 0.61$ ). The  
14 additional information of the distributed variables (i.e. the statistical distribution of the basin data) did not contribute to the  
15 regression models because it was redundant and less important than the lumped variables. The expert assessment included  
16 three variables (MAP, PET, and BFI), and performed similarly to the 22 lumped variables. This signifies that many of the  
17 lumped variables were either redundant or otherwise not useful. With the exception of mean elevation, topographic variables  
18 widely used in FDC regionalization studies were not useful predictors of percentile flows. An important predictor of  
19 percentile flows was Aridity (PET/MAP), which could have been used as a substitute for MAP and PET in the expert  
20 assessment. Another variable alongside Aridity and BFI could be evaluated to possibly improve performance of the expert  
21 assessment.

22 The expert assessment produced simple models that did not decrease predictive performance, and was deemed the  
23 parsimonious approach for selecting the independent variables of the regional regression. The regression models can be  
24 easily used to predict percentile flows for ungauged basins based on MAP, PET, and BFI, and were used to create a tool for  
25 predicting percentile flows in the contiguous US (see the Supplementary Material for this paper). The CONUS Percentile  
26 Flow Predictor generates predictions for the 13 percentile flows of this study, along with estimates of the predictive  
27 uncertainty.

28 The regional regression was used to predict high to low percentile flows ( $Q_{01}$ -  $Q_{99}$ ). Predictive performance was the worst for  
29 the percentile flows at the tails of the FDC (high and low flows). The highest predictive performance for these flows was  
30 obtained using the three variables of the expert assessment, and the other variables used in this study did not improve the  
31 high and low flow predictions. Additional variables may have been needed to characterize the magnitude of storms that drive  
32 high flows (e.g. precipitation percentiles) and the potential contribution of subsurface drainage to low flows (e.g. aquifer  
33 thickness). The development of new variables may also be in order to characterize factors such as the spatial variability of

1 storms (Zoccatelli et al., 2011) and groundwater levels (Costelloe et al., 2015). The low flow predictions may also have been  
2 improved using a modeling scheme that takes the probability of zero flows into account (Hope and Bart, 2011).  
3 The percentile flow predictions may have been improved by modeling methods other than regression. The strongest  
4 predictor of the percentile flows was BFI, and this was derived from a gridded product for the contiguous US that was  
5 spatially interpolated between stream gauges. A similar spatial interpolation approach could be used to predict percentile  
6 flows, and has outperformed regression in a previous study (Archfield et al., 2013). The output of the spatial interpolation  
7 could be served as a data product for predicting the percentile flows of ungauged basins. Regression may also be  
8 outperformed by neural networks that are more resilient to the noise and non-linearity of hydrologic data (Hall et al., 2002).  
9 Neural networks, such as the SOM, could be used to cluster the basins and generate percentile flow predictions in one step.  
10 This would eliminate the need to identify groups of basins for percentile flow modeling, and should be evaluated in future  
11 studies.

12 *Author contribution.* All authors contributed to the design of the study. G. Fouad conducted the research, developed the  
13 CONUS Percentile Flow Predictor, and prepared the manuscript with contributions from all co-authors.

14 *Acknowledgements.* This work was performed for a doctoral study, and could not have been completed without the advising  
15 of Allen Hope at San Diego State University (SDSU). Hugo Loáiciga of the University of California, Santa Barbara (UCSB)  
16 also provided helpful comments as a member of the doctoral committee. The doctoral study was completed for the SDSU-  
17 UCSB Joint Doctoral Program in Geography. The SDSU Department of Geography provided computational support and  
18 helpful computing staff. Barbara Bailey of the SDSU Department of Mathematics and Statistics offered insights on matters  
19 of the validation.

20 *Disclaimer.* Predictions from the CONUS Percentile Flow Predictor are meant as a first approximation of the percentile  
21 flows, and not intended for engineering design of any kind. Users should refer to the governmental standards for predicting  
22 percentile flows in the given jurisdiction.

## 23 **References**

- 24 Abrahart, R. J. and See, L. M.: Neural network modelling of non-linear hydrological relationships, *Hydrol. Earth Syst. Sci.*,  
25 11, 1563–1579, doi:10.5194/hess-11-1563-2007, 2007.
- 26 Archfield, S. A., Pugliese, A., Castellarin, A., Skøien, J. O., and Kiang, J. E.: Topological and canonical kriging for design  
27 flood prediction in ungauged catchments: an improvement over a traditional regional regression approach?, *Hydrol.*  
28 *Earth Syst. Sci.*, 17, 1575–1588, doi:10.5194/hess-17-1575-2013, 2013.

1 Archfield, S. A., Vogel, R. M., and Brandt, S. L.: Estimation of flow-duration curves at ungauged sites in southern New  
2 England, in: World Environmental and Water Resources Congress 2007: Restoring Our Natural Habitat, Tampa,  
3 FL, 15-19 May 2007, doi:10.1061/40927(243)407, 2007.

4 Austin, P. C. and Steyerberg, E. W.: The number of subjects per variable required in linear regression analyses, *J. Clin.*  
5 *Epidemiol.*, 68, 627–636, doi:10.1016/j.jclinepi.2014.12.014, 2015.

6 [Baguley, T.: Multiple regression and the general linear model, in: \*Serious Stats: A Guide to Advanced Statistics for the\*  
7 \*Behavioral Sciences, Palgrave Macmillan, New York, NY, 423–471, 2012.\*](#)

8 Belsley, D. A., Kuh, E., and Welsch, R. E.: Detecting and Assessing Collinearity, in: *Regression Diagnostics: Identifying*  
9 *Influential Data and Sources of Collinearity*, John Wiley and Sons, Hoboken, NJ, 85–191, 2004.

10 Boscarello, L., Ravazzani, G., Cislighi, A., and Mancini, M.: Regionalization of Flow-Duration Curves through Catchment  
11 Classification with Streamflow Signatures and Physiographic-Climate Indices, *J. Hydrol. Eng.*, 21, 05015027,  
12 doi:10.1061/(ASCE)HE.1943-5584.0001307, 2015.

13 Botter, G., Zanardo, S., Porporato, A., Rodriguez-Iturbe, I., and Rinaldo, A.: Ecohydrological model of flow duration curves  
14 and annual minima, *Water Resour. Res.*, 44, W08418, doi:10.1029/2008WR006814, 2008.

15 Breiman, L.: Random Forests, *Mach. Learn.*, 45, 5-32, doi: 10.1023/A:1010933404324, 2001.

16 Brown, A. E., Zhang, L., McMahon, T. A., Western, A. W., and Vertessy, R. A.: A review of paired catchment studies for  
17 determining changes in water yield resulting from alterations in vegetation, *J. Hydrol.*, 310, 28–61,  
18 doi:10.1016/j.jhydrol.2004.12.010, 2005.

19 [Castellarin, A., Botter, G., Hughes, D.A., Liu, S., Ouarda, T.B.M.J., Parajka, J., Post, D.A., Sivapalan, M., Spence, C.,  
20 Viglione, A., and Vogel, R.M.: Prediction of flow duration curves in ungauged basins, in: \*Runoff Prediction in\*  
21 \*Ungauged Basins: Synthesis across Processes, Places and Scales\*, Cambridge University Press, Cambridge, UK,  
22 \[135–162, 2013.\]\(#\)](#)

23 Castellarin, A., Galeati, G., Brandimarte, L., Montanari, A., and Brath, A.: Regional flow-duration curves: reliability for  
24 ungauged basins, *Adv. Water Resour.*, 27, 953–965, doi:10.1016/j.advwatres.2004.08.005, 2004.

25 Cheng, L., Yaeger, M., Viglione, A., Coopersmith, E., Ye, S., and Sivapalan, M.: Exploring the physical controls of regional  
26 patterns of flow duration curves – Part I: Insights from statistical analyses, *Hydrol. Earth Syst. Sci.*, 16, 4435–4446,  
27 doi:10.5194/hess-16-4435-2012, 2012.

28 Costelloe, J. F., Peterson, T. J., Halbert, K., Western, A. W., and McDonnell, J. J.: Groundwater surface mapping informs  
29 sources of catchment baseflow, *Hydrol. Earth Syst. Sci.*, 19, 1599–1613, doi:10.5194/hess-19-1599-2015, 2015.

30 Dalton, K. L.: Variation in timing of vegetation peak greenness on the north slope of Alaska, 1982-1999, M.S. thesis,  
31 Department of Geography, San Diego State University, USA, 75 pp., 2005.

- 1 Daly, C., Halbleib, M., Smith, J. I., Gibson, W. P., Doggett, M. K., Taylor, G. H., Curtis, J., and Pasteris, P. P.:  
2 Physiographically sensitive mapping of climatological temperature and precipitation across the conterminous  
3 United States, *Int. J. Climatol.*, 28, 2031–2064, doi:10.1002/joc.1688, 2008.
- 4 Dawson, C. W. and Wilby, R. L.: Hydrological modelling using artificial neural networks, *Prog. Phys. Geog.*, 25, 80–108,  
5 doi:10.1177/030913330102500104, 2001.
- 6 Desgraupes, B.: *Clustering Indices*, University Paris Ouest, Nanterre, France, 2013.
- 7 Dingman, S. L.: Synthesis of flow-duration curves for unregulated streams in New Hampshire, *Water Resour. Bull.*, 14,  
8 1481–1502, doi:10.1111/j.1752-1688.1978.tb02298.x, 1978.
- 9 Dingman, S. L.: Precipitation, in: *Physical hydrology*, Prentice Hall, Upper Saddle River, NJ, 94–165, 2002.
- 10 Di Prinzio, M., Castellarin, A., and Toth, E.: Data-driven catchment classification: application to the pub problem, *Hydrol.*  
11 *Earth Syst. Sci.*, 15, 1921–1935, doi:10.5194/hess-15-1921-2011, 2011.
- 12 [Dormann, C. F., Elith, J., Bacher, S., Buchmann, C., Carl, G., Carré, G., García Marquéz, J. R., Gruber, B., Lafourcade, B.,](#)  
13 [Leitão, P. J., Münkemüller, T., McClean, C., Osborne, P. E., Reineking, B., Schröder, B., Skidmore, A. K., Zurell,](#)  
14 [D., Lautenbach, S.: Collinearity: a review of methods to deal with it and a simulation study evaluating their](#)  
15 [performance, \*Ecography\*, 36, 27–46, doi:10.1111/j.1600-0587.2012.07348.x, 2013.](#)
- 16 Duan, N.: Smearing Estimate: A Nonparametric Retransformation Method, *J. Am. Stat. Assoc.*, 78, 605–610,  
17 doi:10.1080/01621459.1983.10478017, 1983.
- 18 Dudley, R. W.: Regression Equations for Monthly and Annual Mean and Selected Percentile Streamflows for Ungaged  
19 Rivers in Maine: US Geological Survey, Scientific Investigations Report 2015–5151, 35 p.,  
20 doi:10.3133/sir20155151, 2015.
- 21 Falcone, J. A.: GAGES-II: Geospatial Attributes of Gages for Evaluating Streamflow, Digital Spatial Dataset, US Geological  
22 Survey, available at: [http://water.usgs.gov/GIS/metadata/usgswrd/XML/gagesII\\_Sept2011.xml](http://water.usgs.gov/GIS/metadata/usgswrd/XML/gagesII_Sept2011.xml), 2011.
- 23 Gioia, A., Iacobellis, V., Manfreda, S., and Fiorentino, M.: Influence of infiltration and soil storage capacity on the skewness  
24 of the annual maximum flood peaks in a theoretically derived distribution, *Hydrol. Earth Syst. Sci.*, 16, 937–951,  
25 doi:10.5194/hess-16-937-2012, 2012.
- 26 Greene, W.H.: *Least Squares*, in: *Econometric Analysis*, Prentice Hall, Upper Saddle River, NJ, 19–40, 2003.
- 27 Grünewald, T., Bühler, Y., and Lehning, M.: Elevation dependency of mountain snow depth. *Cryosphere*, 8, 2381–2394, doi:  
28 10.5194/tc-8-2381-2014, 2014.
- 29 Hall, M. J., Minns, A. W., and Ashrafuzzaman, A. K. M.: The application of data mining techniques for the regionalisation  
30 of hydrological variables, *Hydrol. Earth Syst. Sci.*, 6, 685–694, doi:10.5194/hess-6-685-2002, 2002.
- 31 Harrell, F. E.: *Multivariable Modeling Strategies*, in: *Regression Modeling Strategies: With Applications to Linear Models,*  
32 *Logistic Regression, and Survival Analysis*, Springer, New York, NY, 53–86, 2001.

1 [Helsel, D.R. and Hirsch, R.M.: Simple Linear Regression, in: Statistical Methods in Water Resources, US Geological](#)  
2 [Survey, Reston, VA, 221–261, 2002.](#)

3 Holmes, M. G. R., Young, A. R., Gustard, A., and Grew, R.: A region of influence approach to predicting flow duration  
4 curves within ungauged catchments, *Hydrol. Earth Syst. Sci.*, 6, 721–731, doi:10.5194/hess-6-721-2002, 2002.

5 Hope, A. and Bart, R.: Evaluation of a regionalization approach for daily flow duration curves in central and southern  
6 California watersheds, *J. Am. Water Resour. As.*, 48, 123–133, doi:10.1111/j.1752-1688.2011.00597.x, 2011.

7 Hope, A. and Bart, R.: Synthetic monthly flow duration curves for the Cape Floristic Region, South Africa, *Water SA*, 38,  
8 191–200, doi:10.4314/wsa.v38i2.4, 2012.

9 Hope, A., Burvall, A., Germishuys, T., and Newby, T.: River flow response to changes in vegetation cover in a South  
10 African fynbos catchment, *Water SA*, 35, 55–60, doi:10.4314/wsa.v35i1.76652, 2009.

11 Hosking, J. R. M. and Wallis, J. R.: Identification of homogeneous regions, in: *Regional Frequency Analysis: An Approach*  
12 *Based on L-Moments*, Cambridge University Press, Cambridge, UK, 54–72, 1997.

13 Ilorme, F.: Delineation of Hydrologically Homogeneous Regions Using Spatially Distributed Data, in: *Development of a*  
14 *Physically-based Method for Delineation of Hydrologically Homogeneous Regions and Flood Quantile Estimation*  
15 *in Ungauged Basins Via the Index Flood Method*, Ph.D. thesis, Department of Civil and Environmental  
16 Engineering, Michigan Technological University, USA, 97–119, 2011.

17 Kennard, M. J., Mackay, S. J., Pusey, B. J., Olden, J. D., and Marsh, N.: Quantifying uncertainty in estimation of hydrologic  
18 metrics for ecohydrological studies, *River Res. Appl.*, 26, 137–156, doi:10.1002/rra.1249, 2010.

19 Klemeš, V.: Operational testing of hydrological simulation models, *Hydrolog. Sci. J.*, 31, 13–24,  
20 doi:10.1080/02626668609491024, 1986.

21 Kohonen, T.: The Self-Organizing Map, *P. IEEE*, 78, 1464–1480, doi:10.1109/5.58325, 1990.

22 Kroll, C. N. and Song, P.: Impact of multicollinearity on small sample hydrologic regression models, *Water Resour. Res.*,  
23 49, 3756–3769, doi:10.1002/wrcr.20315, 2013.

24 Laaha, G. and Blöschl, G.: A comparison of low flow regionalisation methods – catchment grouping, *J. Hydrol.*, 323, 193–  
25 214, doi:10.1016/j.jhydrol.2005.09.001, 2006.

26 Ley, R., Casper, M. C., Hellebrand, H., and Merz, R.: Catchment classification by runoff behavior with self-organizing maps  
27 (SOM), *Hydrol. Earth Syst. Sci.*, 15, 2947–2962, doi:10.5194/hess-15-2947-2011, 2011.

28 Miller, D. A. and White, R. A.: A Conterminous United States Multilayer Soil Characteristics Dataset for Regional Climate  
29 and Hydrology Modeling, *Earth Interact.*, 2, 2-002, doi:10.1175/1087-3562(1998)002<0001:ACUSMS>2.3.CO;2,  
30 1998.

31 Mimikou, M. and Kaemaki, S.: Regionalization of flow duration characteristics, *J. Hydrol.*, 82, 77–91, doi:10.1016/0022-  
32 1694(85)90048-4, 1985.

1 Mohamoud, Y. M.: Prediction of daily flow duration curves and streamflow for ungauged catchments using regional flow  
2 duration curves, *Hydrolog. Sci. J.*, 53, 706–724, doi:10.1623/hysj.53.4.706, 2008.

3 Muneeppeerakul, R., Azaele, S., Botter, G., Rinaldo, A., and Rodriguez-Iturbe, I.: Daily streamflow analysis based on a two-  
4 scaled gamma pulse model, *Water Resour. Res.*, 46, W11546, doi:10.1029/2010WR009286, 2010.

5 Nash, J. E. and Sutcliffe, J. V.: River flow forecasting through conceptual models part I – A discussion of principles, *J.*  
6 *Hydrol.*, 10, 282–290, doi:10.1016/0022-1694(70)90255-6, 1970.

7 Natural Resources Conservation Service (NRCS): Hydrologic Soil Groups, in: Part 630 Hydrology National Engineering  
8 Handbook, NRCS, Washington, DC, 630.0700–630.0703, 2007.

9 Nyeko-Ogiramoi, P., Willems, P., Mutua, F. M., and Moges, S. A.: An elusive search for regional flood frequency estimates  
10 in the River Nile basin, *Hydrol. Earth Syst. Sci.*, 16, 3149–3163, doi:10.5194/hess-16-3149-2012, 2012.

11 Oudin, L., Hervieu, F., Michel, C., Perrin, C., Andréassian, V., Anctil, F., and Loumagne, C.: Which potential  
12 evapotranspiration input for a lumped rainfall-runoff model? Part 2-Towards a simple and efficient potential  
13 evapotranspiration model for rainfall-runoff modelling, *J. Hydrol.*, 303, 290–306,  
14 doi:10.1016/j.jhydrol.2004.08.026, 2005.

15 Over, T. M., Riley, J. D., Sharpe, J. B., and Arvin, D.: Estimation of Regional Flow-Duration Curves for Indiana and Illinois:  
16 US Geological Survey, Scientific Investigations Report 2014–5177, 24 pp., doi:10.3133/sir20145177, 2014.

17 Peel, M. C., Finlayson, B. L., and McMahon, T. A.: Updated world map of the Köppen-Geiger climate classification,  
18 *Hydrol. Earth Syst. Sci.*, 11, 1633–1644, doi:10.5194/hess-11-1633-2007, 2007.

19 Price, K.: Effects of watershed topography, soils, land use, and climate on baseflow hydrology in humid regions: A review,  
20 *Prog. Phys. Geog.*, 35, 465–492, doi:10.1177/0309133311402714, 2011.

21 Reed, J. C. and Bush, C. A.: Generalized Geologic Map of the United States, Puerto Rico, and the US Virgin Islands, Digital  
22 Spatial Dataset, US Geological Survey, available at: <https://pubs.usgs.gov/atlas/geologic/>, 2007.

23 Ries, K. G.: The National Streamflow Statistics Program: A Computer Program for Estimating Streamflow Statistics for  
24 Ungaged Sites: US Geological Survey, Techniques and Methods 4–A6, 48 pp., 2007.

25 Rosenberg, E. A., Clark, E. A., Steinemann, A. C., and Lettenmaier, D. P.: On the contribution of groundwater storage to  
26 interannual streamflow anomalies in the Colorado River basin, *Hydrol. Earth Syst. Sci.*, 17, 1475–1491,  
27 doi:10.5194/hess-17-1475-2013, 2013.

28 Salinas, J. L., Laaha, G., Rogger, M., Parajka, J., Viglione, A., Sivapalan, M., and Blöschl, G.: Comparative assessment of  
29 predictions in ungauged basins – Part 2: Flood and low flow studies, *Hydrol. Earth Syst. Sci.*, 17, 2637–2652,  
30 doi:10.5194/hess-17-2637-2013, 2013.

31 Sauquet, E. and Catalogne, C.: Comparison of catchment grouping methods for flow duration curve estimation at ungauged  
32 sites in France, *Hydrol. Earth Syst. Sci.*, 15, 2421–2435, doi:10.5194/hess-15-2421-2011, 2011.

1 Schaller, M. F. and Fan, Y.: River basins as groundwater exporters and importers: Implications for water cycle and climate  
2 modeling, *J. Geophys. Res.*, 114, D04103, doi:10.1029/2008JD010636, 2009.

3 Singh, K. P.: Model Flow Duration and Streamflow Variability, *Water Resour. Res.*, 7, 1031–1036,  
4 doi:10.1029/WR007i004p01031, 1971.

5 [Sivapalan, M., Takeuchi, K., Franks, S.W., Gupta, V.K., Karambiri, H., Lakshmi, V., Liang, X., McDonnell, J.J.,  
6 Mendiondo, E.M., O'Connell, P.E., Oki, T., Pomeroy, J.W., Schertzer, D., Uhlenbrook, S., and Zehe, E.: IAHS  
7 Decade on Predictions in Ungauged Basins \(PUB\), 2003-2012: Shaping an exciting future for the hydrological  
8 sciences, \*Hydrolog. Sci. J.\*, 48, 857-880, doi: 10.1623/hysj.48.6.857.51421, 2003.](#)

9 Skupin, A.: Visualizing a knowledge domain with cartographic means, *P. Natl. Acad. Sci. USA*, 101, 5274–5278,  
10 doi:10.1073/pnas.0307654100, 2004.

11 Snelder, T. H., Datry, T., Lamouroux, N., Larned, S. T., Sauquet, E., Pella, H., and Catalogne, C.: Regionalization of  
12 patterns of flow intermittence from gauging station records, *Hydrol. Earth Syst. Sci.*, 17, 2685–2699,  
13 doi:10.5194/hess-17-2685-2013, 2013.

14 Ssegane, H., Tollner, E. W., Mohamoud, Y. M., Rasmussen, T. C., and Dowd, J. F.: Advances in variable selection methods  
15 II: Effect of variable selection method on classification of hydrologically similar watersheds in three Mid-Atlantic  
16 ecoregions, *J. Hydrol.*, 438–439, 26–38, doi:10.1016/j.jhydrol.2012.01.035, 2012a.

17 Ssegane, H., Tollner, E. W., Mohamoud, Y. M., Rasmussen, T. C., and Dowd, J. F.: Advances in variable selection methods  
18 I: Causal selection methods versus stepwise regression and principal component analysis on data of known and  
19 unknown functional relationships, *J. Hydrol.*, 438–439, 16–25, doi:10.1016/j.jhydrol.2012.01.008, 2012b.

20 Tague, C. and Grant, G. E.: A geological framework for interpreting the low-flow regimes of Cascade streams, Willamette  
21 River Basin, Oregon, *Water Resour. Res.*, 40, W04303, doi:10.1029/2003WR002629, 2004.

22 Toth, E.: Catchment classification based on characterisation of streamflow and precipitation time series, *Hydrol. Earth Syst.  
23 Sci.*, 17, 1149–1159, doi:10.5194/hess-17-1149-2013, 2013.

24 Vesanto, J., Himberg, J., Alhoniemi, E., and Parhankangas, J.: Self-Organizing Map (SOM), in: *SOM Toolbox for Matlab 5*,  
25 Helsinki University of Technology, Helsinki, Finland, 7–11, 2000.

26 Vogel, R. M. and Fennessey, N. M.: Flow Duration Curves II: A Review of Applications in Water Resources Planning, *J.  
27 Am. Water Resour. As.*, 31, 1029–1039, doi:10.1111/j.1752-1688.1995.tb03419.x, 1995.

28 Vogelmann, J. E., Howard, S. M., Yang, L., Larson, C. R., Wylie, B. K., and Van Driel, J. N.: Completion of the 1990's  
29 National Land Cover Data Set for the conterminous United States, *Photogramm. Eng. Rem. S.*, 67, 650–662, 2001.

30 Westerberg, I.K., Gong, L., Beven, K.J., Seibert, J., Semedo, A., Xu, C.Y., and Halldin, S.: Regional water balance  
31 modelling using flow-duration curves with observational uncertainties, *Hydrol. Earth Syst. Sci.*, 18, 2993-3013, doi:  
32 10.5194/hess-18-2993-2014, 2014.

1 Williams, L. J. and Dixon, J. F.: Digital Surfaces and Thicknesses of Selected Hydrogeologic Units of the Floridan Aquifer  
2 System in Florida and Parts of Georgia, Alabama, and South Carolina, Data Series 926, US Geological Survey,  
3 available at: <http://pubs.usgs.gov/ds/0926/>, 2015.

4 Wolock, D. M.: Base-Flow Index Grid for the Conterminous United States, Open-File Report 03-263, US Geological  
5 Survey, available at: <http://water.usgs.gov/lookup/getspatial?bfi48grd>, 2003.

6 Ye, S., Yaeger, M., Coopersmith, E., Cheng, L., and Sivapalan, M.: Exploring the physical controls of regional patterns of  
7 flow duration curves – Part 2: Role of seasonality, the regime curve, and associated process controls, *Hydrol. Earth  
8 Syst. Sci.*, 16, 4447–4465, doi:10.5194/hess-16-4447-2012, 2012.

9 Yokoo, Y. and Sivapalan, M.: Towards reconstruction of the flow duration curve: development of a conceptual framework  
10 with a physical basis, *Hydrol. Earth Syst. Sci.*, 15, 2805–2819, doi: 10.5194/hess-15-2805-2011, 2011.

11 Yuan, L. L.: Using correlation of daily flows to identify index gauges for ungauged streams, *Water Resour. Res.*, 49, 604–  
12 613, doi:10.1002/wrcr.20070, 2013.

13 Zocatelli, D., Borga, M., Viglione, A., Chirico, G. B., and Blöschl, G.: Spatial moments of catchment rainfall: rainfall  
14 spatial organisation, basin morphology, and flood response, *Hydrol. Earth Syst. Sci.*, 15, 3767–3783,  
15 doi:10.5194/hess-15-3767-2011, 2011.

16



1 **Table 1.** Independent variables used in this study, with the different sets of variables used to develop regional regression  
 2 models identified as expert (E), lumped (L), and distributed (D) in the last column.

| Independent variable | Units              | Description                                                                                                          | Data source            | Set     |
|----------------------|--------------------|----------------------------------------------------------------------------------------------------------------------|------------------------|---------|
| MAP                  | mm                 | Mean annual precipitation                                                                                            | PRISM                  | E, L, D |
| PET                  | mm                 | Mean annual potential evapotranspiration calculated using the Oudin et al. (2005) equation                           | PRISM                  | E, L, D |
| BFI                  | %                  | Mean baseflow index derived from a spatially interpolated grid                                                       | BFI48GRD               | E, L, D |
| Precip_SD            | mm                 | Standard deviation of annual precipitation                                                                           | PRISM                  | L       |
| Forest               | %                  | Percent forest cover                                                                                                 | NLCD 1992              | L       |
| Precip_1D_Max        | mm                 | Median of annual 1-day maximum precipitation                                                                         | PRISM                  | L, D    |
| Precip_Intensity     | mm d <sup>-1</sup> | Precipitation per rainy day                                                                                          | PRISM                  | L, D    |
| Spring_Temp          | °C                 | Average temperature from April-June                                                                                  | PRISM                  | L, D    |
| Aridity              | -                  | Aridity index calculated as PET/MAP                                                                                  | PRISM                  | L, D    |
| Percent_Snow         | %                  | Mean annual percent of precipitation as snow                                                                         | GAGES-II               | L, D    |
| Area                 | km <sup>2</sup>    | Drainage area                                                                                                        | GAGES-II               | L, D    |
| Density              | km <sup>-1</sup>   | Drainage density calculated as stream length divided by drainage area                                                | NHDPlusV2,<br>GAGES-II | L, D    |
| Orientation          | °N                 | Basin angle along main channel                                                                                       | GAGES-II               | L, D    |
| Elev                 | m                  | Mean elevation                                                                                                       | NED                    | L, D    |
| Relief_Ratio         | %                  | Relief ratio calculated as elevation range divided by basin length along main channel                                | NED,<br>GAGES-II       | L, D    |
| Slope                | %                  | Mean slope                                                                                                           | NED                    | L, D    |
| Aspect               | °N                 | Mean aspect                                                                                                          | NED                    | L, D    |
| Accumulation         | km <sup>2</sup>    | Mean flow accumulation expressed as upslope area                                                                     | NED                    | L, D    |
| TWI                  | -                  | Mean topographic wetness index calculated as $\ln(\text{Accumulation}/\tan(\text{Slope}))$                           | NED                    | L, D    |
| Soil_Porosity        | %                  | Mean soil porosity expressed as percent pore volume                                                                  | CONUS-SOIL             | L, D    |
| Water_Capacity       | %                  | Mean water capacity expressed as percent volume at field capacity                                                    | CONUS-SOIL             | L, D    |
| Poorly_Drained       | %                  | Percent poorly drained including hydrologic soil groups C and D (NRCS, 2007)                                         | CONUS-SOIL             | L, D    |
| Precip_Lag1          | -                  | Lag-1 autocorrelation coefficient of monthly precipitation data                                                      | PRISM                  | D       |
| Wet_Season           | -                  | Binary variables indicating season with peak precipitation calculated using circular statistics as in Dingman (2002) | PRISM                  | D       |

*Table continued on next page*

| Independent variable | Units              | Description                                                                                                         | Data source | Set |
|----------------------|--------------------|---------------------------------------------------------------------------------------------------------------------|-------------|-----|
| Precip_Seasonality   | -                  | Distribution of monthly precipitation throughout the year calculated using circular statistics as in Dingman (2002) | PRISM       | D   |
| Precip_1D_Max_SD     | mm                 | Standard deviation of Precip_1D_Max                                                                                 | PRISM       | D   |
| Precip_Intensity_SD  | mm d <sup>-1</sup> | Standard deviation of annual Precip_Intensity                                                                       | PRISM       | D   |
| PET_Amp              | mm                 | Amplitude of the first term of the Fourier transform for monthly PET data as in Dalton (2005)                       | PRISM       | D   |
| PET_Ph               | rad                | Phase of the first term of the Fourier transform for monthly PET data as in Dalton (2005)                           | PRISM       | D   |
| Aridity_SD           | -                  | Standard deviation of annual Aridity                                                                                | PRISM       | D   |
| Elev_SD              | m                  | Standard deviation of elevation                                                                                     | NED         | D   |
| Slope_SD             | %                  | Standard deviation of slope                                                                                         | NED         | D   |
| Aspect_SD            | °N                 | Standard deviation of aspect                                                                                        | NED         | D   |
| Accumulation_SD      | km <sup>2</sup>    | Standard deviation of flow accumulation                                                                             | NED         | D   |
| TWI_SD               | -                  | Standard deviation of topographic wetness index                                                                     | NED         | D   |
| Forest_Rip           | %                  | Percent forest cover within 800 m of a stream channel                                                               | GAGES-II    | D   |
| Soil_Porosity_SD     | %                  | Standard deviation of soil porosity                                                                                 | CONUS-SOIL  | D   |
| Water_Capacity_SD    | %                  | Standard deviation of water capacity                                                                                | CONUS-SOIL  | D   |
| BFI_SD               | %                  | Standard deviation of baseflow index                                                                                | BFI48GRD    | D   |

1

1 **Table 2.** Top five lumped and distributed variables for predicting high (Q<sub>01</sub>-Q<sub>20</sub>), average (Q<sub>30</sub>-Q<sub>70</sub>), and low (Q<sub>80</sub>-Q<sub>99</sub>)  
 2 percentile flows based on the percent of the regression models that included each variable (in parentheses).

| Lumped                 |                        |                          | Distributed                  |                          |                          |
|------------------------|------------------------|--------------------------|------------------------------|--------------------------|--------------------------|
| High                   | Average                | Low                      | High                         | Average                  | Low                      |
| BFI<br>(62.5)          | BFI<br>(81.4)          | BFI<br>(76.8)            | BFI<br>(60.7)                | BFI<br>(75.7)            | BFI<br>(80.4)            |
| Aridity<br>(55.4)      | MAP<br>(52.9)          | MAP<br>(44.6)            | Aridity<br>(41.1)            | Aridity_SD<br>(40.0)     | Poorly_Drained<br>(44.6) |
| MAP<br>(48.2)          | Aridity<br>(45.7)      | Aridity<br>(44.6)        | Percent_Snow<br>(32.1)       | Elev<br>(37.1)           | Percent_Snow<br>(28.6)   |
| Percent_Snow<br>(39.3) | Elev<br>(37.1)         | Poorly_Drained<br>(42.9) | Precip_Seasonality<br>(30.4) | Poorly_Drained<br>(34.3) | Elev<br>(25.0)           |
| Spring_Temp<br>(37.5)  | Percent_Snow<br>(34.3) | Spring_Temp<br>(35.7)    | PET<br>(30.4)                | Aridity<br>(30.0)        | MAP<br>(21.4)            |

3

1 **Table 3.** The mean and range of the CN for the regression models developed using the three different sets of variables.

|         | Expert            | Lumped            | Distributed          |
|---------|-------------------|-------------------|----------------------|
| Minimum | 522               | 161               | 49                   |
| Mean    | $4.8 \times 10^4$ | $3.2 \times 10^5$ | $7.1 \times 10^7$    |
| Maximum | $3.4 \times 10^5$ | $4.9 \times 10^7$ | $1.2 \times 10^{10}$ |

2

**Table 4.** Predictive performance of the regression models developed using expert, lumped, and distributed variables as well as the performance of the drainage-area ratio (DAR) method, variables and summarized as (a) the sum of absolute E, (b)  $R^2$ , and (c) N. Bold numbers indicate the most effective approach for each percentile flow. Negative N values for DAR represent poorer performance than using the average flow of the validation basins for all predictions, set of variables that produced the best regression models for each percentile flow.

(a)

|             | Q <sub>01</sub> | Q <sub>05</sub> | Q <sub>10</sub> | Q <sub>20</sub> | Q <sub>30</sub> | Q <sub>40</sub> | Q <sub>50</sub> | Q <sub>60</sub> | Q <sub>70</sub> | Q <sub>80</sub> | Q <sub>90</sub> | Q <sub>95</sub> | Q <sub>99</sub> |
|-------------|-----------------|-----------------|-----------------|-----------------|-----------------|-----------------|-----------------|-----------------|-----------------|-----------------|-----------------|-----------------|-----------------|
| Expert      | <b>9.89</b>     | <b>9.00</b>     | 8.93            | 8.83            | 9.01            | 9.46            | 9.80            | 9.89            | 9.64            | 9.23            | <b>8.31</b>     | <b>7.61</b>     | <b>6.69</b>     |
| Lumped      | 11.5            | 10.1            | <b>8.51</b>     | <b>8.24</b>     | <b>8.36</b>     | <b>8.70</b>     | <b>8.83</b>     | <b>8.92</b>     | <b>8.97</b>     | <b>9.03</b>     | 8.76            | 8.14            | 7.15            |
| Distributed | 11.5            | 9.32            | 9.05            | 9.01            | 9.14            | 9.31            | 9.45            | 10.0            | 9.54            | 9.56            | 8.81            | 8.11            | 6.97            |
| <b>DAR</b>  | <b>21.4</b>     | <b>36.7</b>     | <b>44.7</b>     | <b>19.5</b>     | <b>18.8</b>     | <b>18.2</b>     | <b>17.3</b>     | <b>16.4</b>     | <b>15.5</b>     | <b>14.6</b>     | <b>13.0</b>     | <b>11.8</b>     | <b>10.0</b>     |

(b)

|             | Q <sub>01</sub> | Q <sub>05</sub> | Q <sub>10</sub> | Q <sub>20</sub> | Q <sub>30</sub> | Q <sub>40</sub> | Q <sub>50</sub> | Q <sub>60</sub> | Q <sub>70</sub> | Q <sub>80</sub> | Q <sub>90</sub> | Q <sub>95</sub> | Q <sub>99</sub> |
|-------------|-----------------|-----------------|-----------------|-----------------|-----------------|-----------------|-----------------|-----------------|-----------------|-----------------|-----------------|-----------------|-----------------|
| Expert      | <b>0.60</b>     | <b>0.67</b>     | 0.71            | 0.71            | 0.72            | 0.72            | 0.69            | 0.66            | 0.64            | 0.63            | <b>0.64</b>     | <b>0.64</b>     | <b>0.63</b>     |
| Lumped      | 0.47            | 0.58            | <b>0.71</b>     | <b>0.77</b>     | <b>0.77</b>     | <b>0.75</b>     | <b>0.74</b>     | <b>0.71</b>     | <b>0.68</b>     | <b>0.64</b>     | 0.58            | 0.56            | 0.52            |
| Distributed | 0.42            | 0.60            | 0.67            | 0.71            | 0.72            | 0.71            | 0.69            | 0.64            | 0.63            | 0.60            | 0.58            | 0.55            | 0.52            |
| <b>DAR</b>  | <b>0.29</b>     | <b>0.30</b>     | <b>0.32</b>     | <b>0.27</b>     | <b>0.28</b>     | <b>0.29</b>     | <b>0.29</b>     | <b>0.28</b>     | <b>0.27</b>     | <b>0.26</b>     | <b>0.27</b>     | <b>0.27</b>     | <b>0.25</b>     |

(c)

|             | Q <sub>01</sub> | Q <sub>05</sub> | Q <sub>10</sub> | Q <sub>20</sub> | Q <sub>30</sub> | Q <sub>40</sub> | Q <sub>50</sub> | Q <sub>60</sub> | Q <sub>70</sub> | Q <sub>80</sub> | Q <sub>90</sub> | Q <sub>95</sub> | Q <sub>99</sub> |
|-------------|-----------------|-----------------|-----------------|-----------------|-----------------|-----------------|-----------------|-----------------|-----------------|-----------------|-----------------|-----------------|-----------------|
| Expert      | <b>0.59</b>     | <b>0.67</b>     | <b>0.70</b>     | 0.71            | 0.72            | 0.71            | 0.69            | 0.66            | 0.63            | 0.63            | <b>0.63</b>     | <b>0.62</b>     | <b>0.60</b>     |
| Lumped      | 0.45            | 0.58            | 0.70            | <b>0.75</b>     | <b>0.76</b>     | <b>0.74</b>     | <b>0.74</b>     | <b>0.71</b>     | <b>0.68</b>     | <b>0.63</b>     | 0.58            | 0.56            | 0.51            |
| Distributed | 0.39            | 0.60            | 0.66            | 0.69            | 0.70            | 0.70            | 0.68            | 0.63            | 0.62            | 0.59            | 0.58            | 0.54            | 0.51            |
| <b>DAR</b>  | <b>-0.37</b>    | <b>-0.40</b>    | <b>0.22</b>     | <b>-0.70</b>    | <b>-0.49</b>    | <b>-0.37</b>    | <b>-0.31</b>    | <b>-0.29</b>    | <b>-0.27</b>    | <b>-0.22</b>    | <b>-0.16</b>    | <b>-0.11</b>    | <b>-0.14</b>    |

**Comment [GF17]:** Referee 2 – Drainage-area ratio method added to performance comparison, demonstrating usefulness of regression models.

Formatted Table

Formatted Table

Formatted Table

1 **Table 5.** The overall performance of the regression models developed using the expert assessment (expert) and data-driven  
2 approach (lumped and distributed) quantified as the sum of absolute E and mean  $R^2$  and N for all the percentile flows. Bold  
3 numbers indicate the approach that produced the best overall regression models.

|       | Expert      | Lumped     | Distributed |
|-------|-------------|------------|-------------|
| E     | 116         | <b>115</b> | 120         |
| $R^2$ | <b>0.67</b> | 0.65       | 0.62        |
| N     | <b>0.66</b> | 0.65       | 0.61        |

1 **Table 6.** Range of the data used to create the CONUS Percentile Flow Predictor. Input data for the tool should be within this  
2 range.

|         | MAP  | PET  | BFI |
|---------|------|------|-----|
| Minimum | 234  | 292  | 3   |
| Maximum | 4117 | 1390 | 85  |

3

1

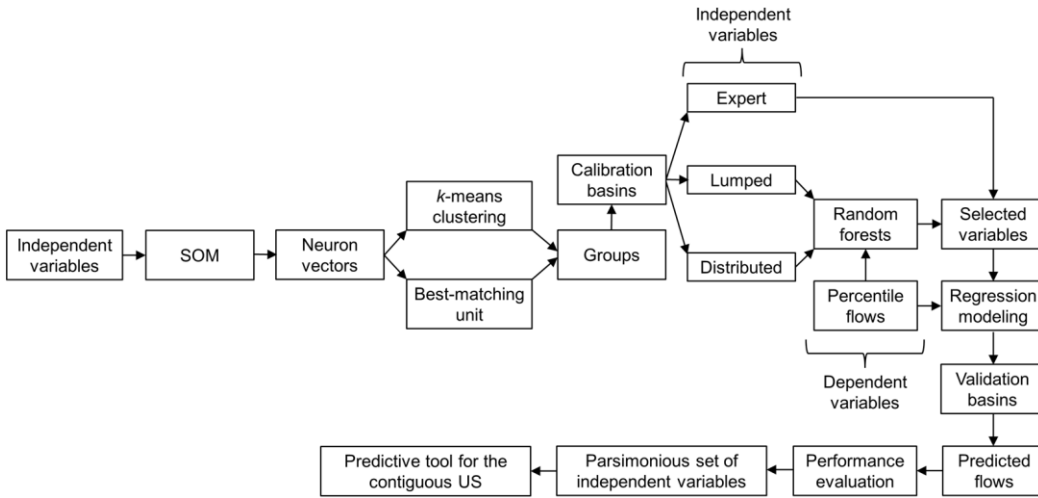

2

3 **Fig. 1.** Steps for developing regional regression models using expert, lumped, and distributed variables in order to identify a  
4 parsimonious set of variables and introduce a tool for predicting percentile flows in the contiguous US.



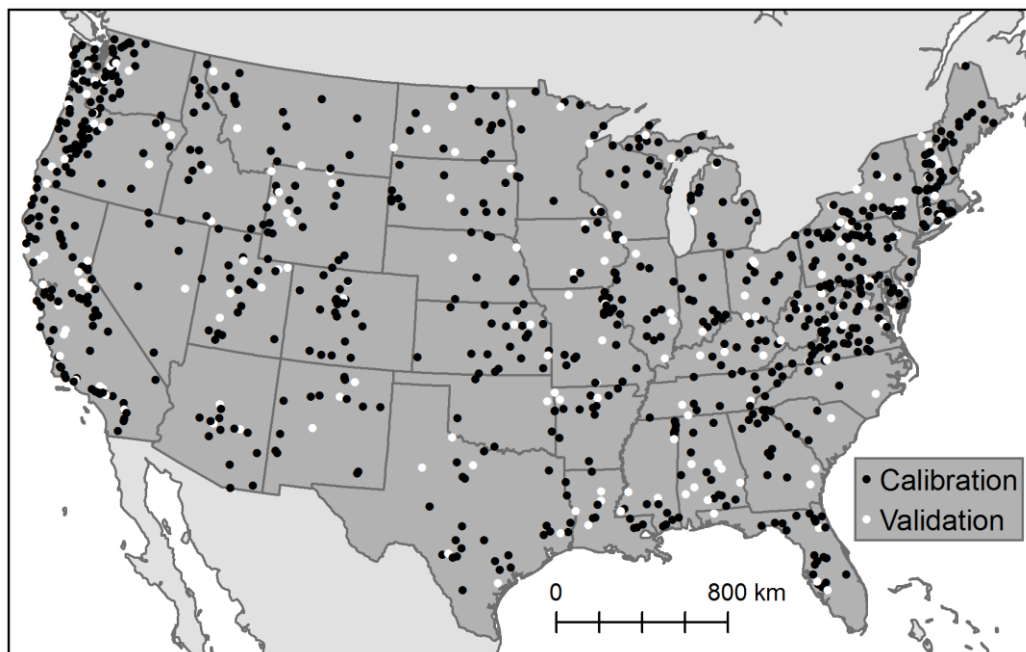

1

2 **Fig. 2.** Map of the 734 calibration and 184 validation basins in the contiguous US represented by the location of their stream  
3 gauges.

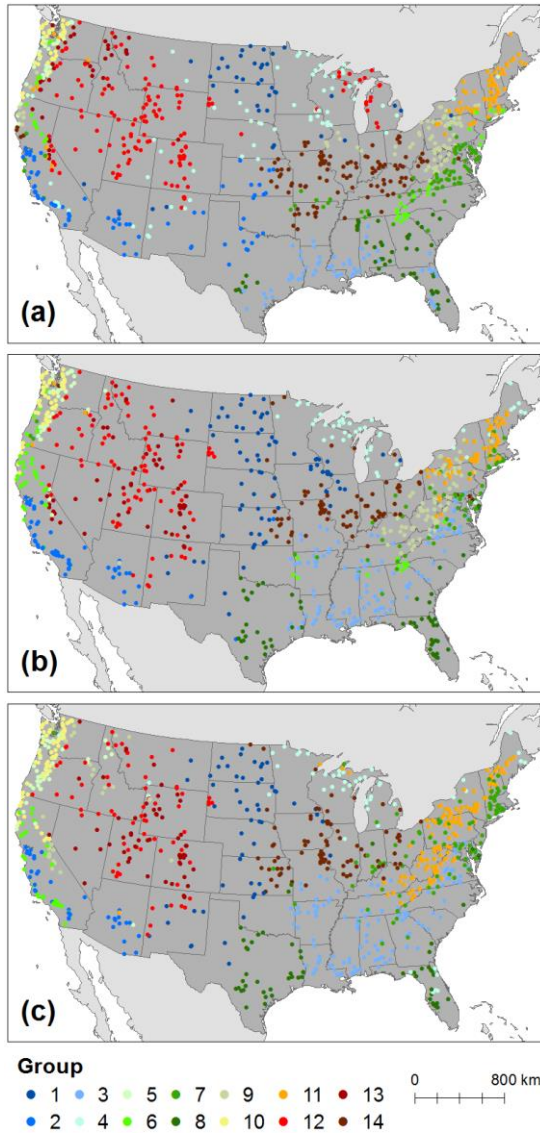

1

2 **Fig. 3.** Maps of the study basins split into 14 groups using the (a) expert, (b) lumped, and (c) distributed variables.

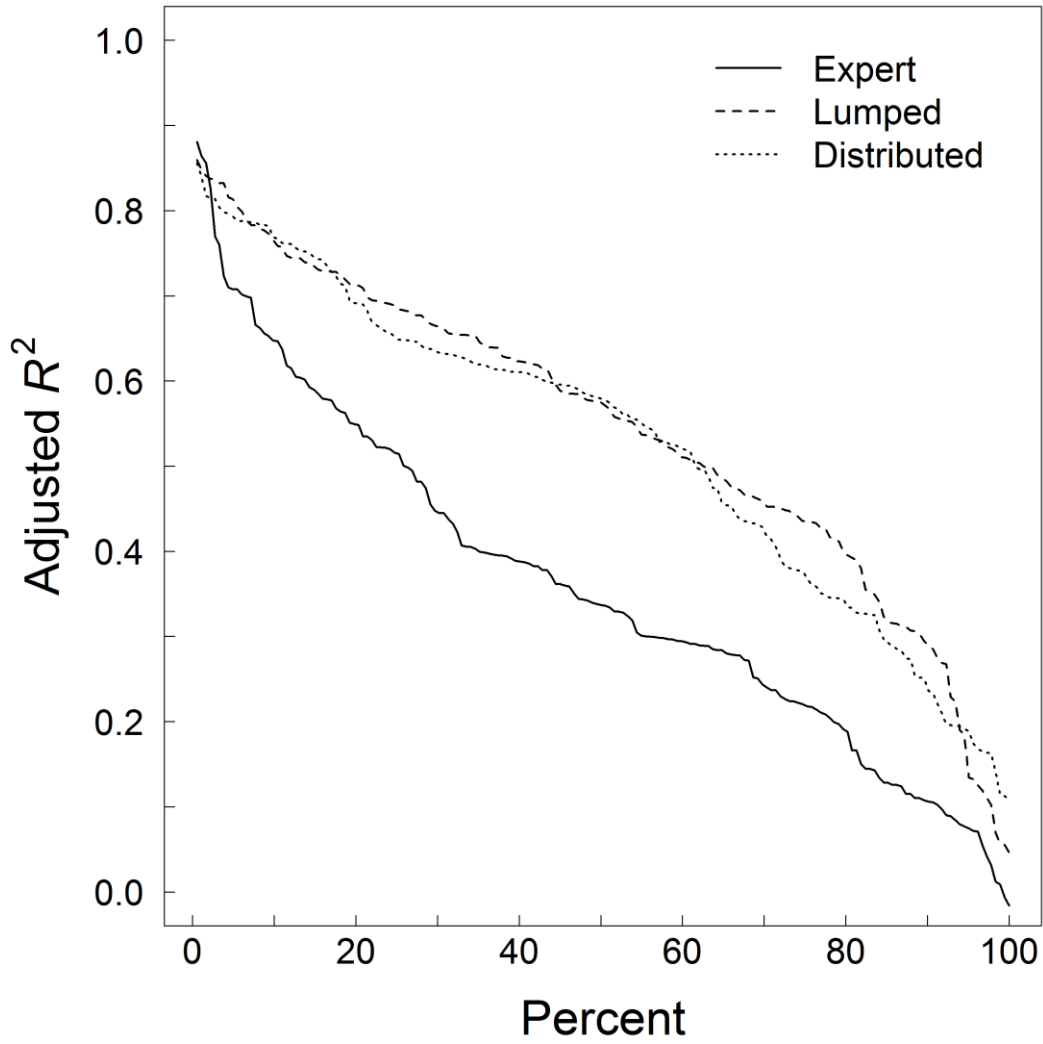

1

2 **Fig. 4.** Percent of the regression models with an adjusted  $R^2 \geq$  the given value.
